# Supplementary material for: No Evidence Was Found for the Presence of Terreolides, Terreumols or Saponaceolides H-S in the Fruiting Bodies of Tricholoma terreum (Basidiomycota, Agaricales)
Source: MDPI journal article supplement (doi:10.3390/molecules29081794), 2024-04-15
Supplement: s1 [file s1]

## Supplementary Materials

### No Evidence Was Found for the Presence of Terreolides, Terreumols or Saponaceolides H-S in the Fruiting Bodies of *Tricholoma terreum* (Basidiomycota, Agaricales)

#### Table of contents:

1. Figure S1: SIM search for the mass peak corresponding to the formula  $C_{30}H_{44}O_7$  (terreolide A)
2. Figure S2: SIM search for the mass peak corresponding to the formula  $C_{17}H_{20}O_6$  (terreumol A)
3. Figure S3: SIM search for the mass peak corresponding to the formula  $C_{32}H_{46}O_9$  (saponaceolide M)
4. Figure S4: Mass spectrum of the peak at  $t_R$  13.1 minutes in the chromatogram of fig. 3. Best fit is found for a molecular formula  $C_{18}H_{30}O_2$
5. Figure S5: Mass spectrum of the peak at  $t_R$  13.6 minutes in the chromatogram of fig. 3. Best fit is found for a molecular formula  $C_{18}H_{30}O_3$
6. Figure S6: Mass spectrum of the peak at  $t_R$  17.3 minutes in the chromatogram of fig. 3. Best fit is found for a molecular formula  $C_{28}H_{42}O$ .
7. Figure S7: Mass spectrum of the peak at  $t_R$  21.1 minutes in the chromatogram of fig. 3. Best fit is found for a molecular formula  $C_{28}H_{42}O$
8. Figure S8: GC-MS analysis of the fatty acid content of the *T. terreum*\_Bz extract
9. Figure S9: GC-MS analysis of the fatty acid content of the *T. terreum*\_Bz extract after addition of a reference standard of asclepic acid.
10. Figure S10:  $^1H$  NMR spectrum of ergosterol extracted from *T. terreum*\_Bz
11. Figure S11:  $^{13}C$  NMR spectrum of ergosterol extracted from *T. terreum*\_Bz
12. Figure S12:  $^{13}C$  DEPT135 NMR spectrum of ergosterol extracted from *T. terreum*\_Bz
13. Figure S13: GC-MS spectrum of ergosterol extracted from *T. terreum*\_Bz
14. Figure S14:  $^1H$  NMR spectrum of saponaceolide B
15. Figure S15:  $^{13}C$  NMR spectrum of saponaceolide B
16. Figure S16: NMR-DEPT experiment of saponaceolide B
17. Figure S17: ESI-MS analysis of saponaceolide B
18. Figure S18: HPLC analysis of a reference standard of saponaceolide A
19. Figure S19: HPLC analysis of a reference standard of saponaceolide B
20. Figure S20: HPLC analysis *T. terreum*\_Bz extract

21. Figure S21:  $^1\text{H}$  NMR spectrum of the coriolic acid extracted from *T. terreum*\_Bz
22. Figure S22:  $^{13}\text{C}$  NMR spectrum of the coriolic acid extracted from *T. terreum*\_Bz
23. Figure S23: ESI-MS spectrum of the coriolic acid extracted from *T. terreum*\_Bz

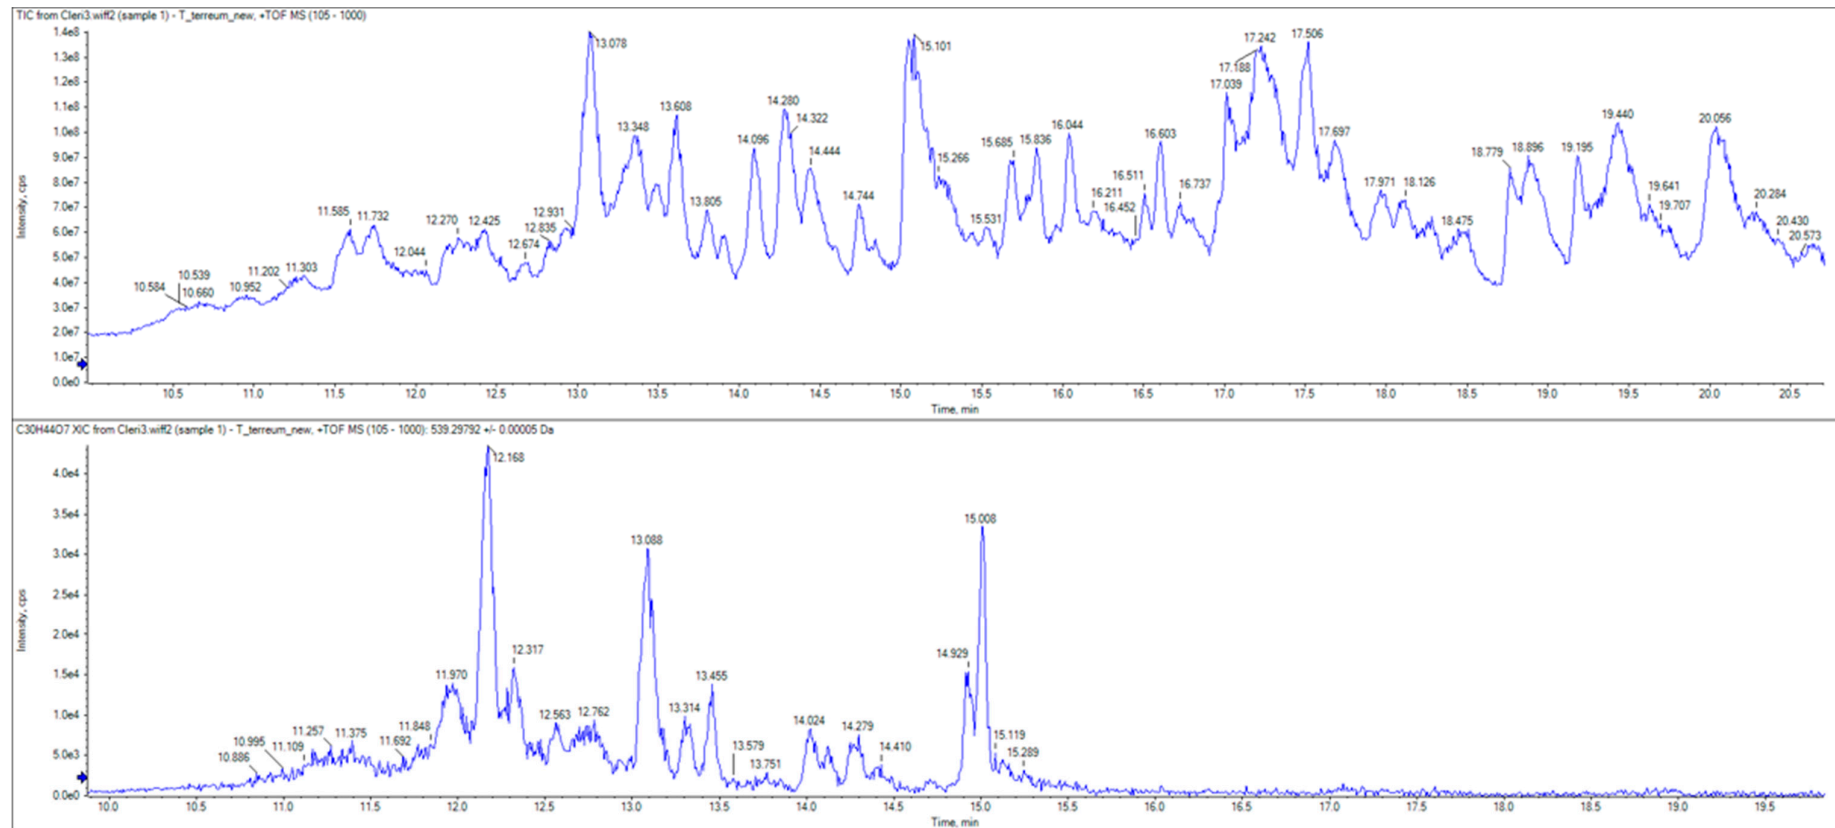

**Figure S1:** SIM search for the mass peak corresponding to the formula  $C_{30}H_{44}O_7$  (terreolide A), in the HR-ESI<sup>+</sup> chromatogram of *T. terreum*\_Bz. Note that the intensity of the retrieved peaks is almost four orders of magnitude lower than the peaks in the TIC chromatogram. As a consequence, we consider this as a negative result.

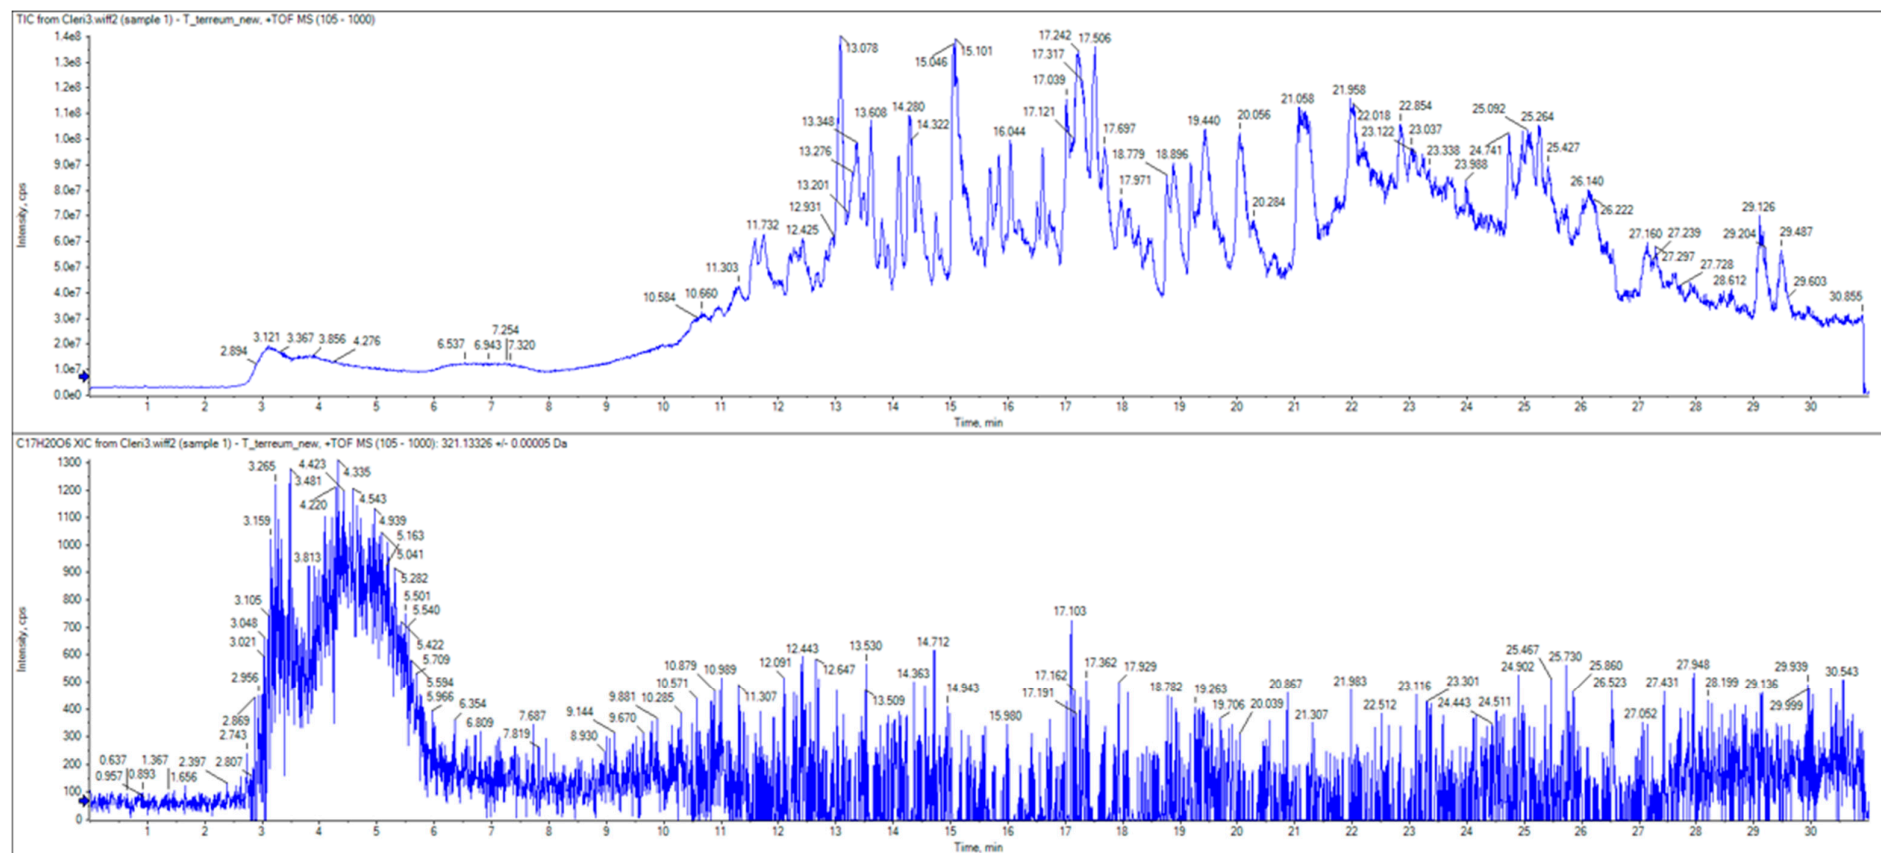

**Figure S2:** SIM search for the mass peak corresponding to the formula  $C_{17}H_{20}O_6$  (terreumol A).



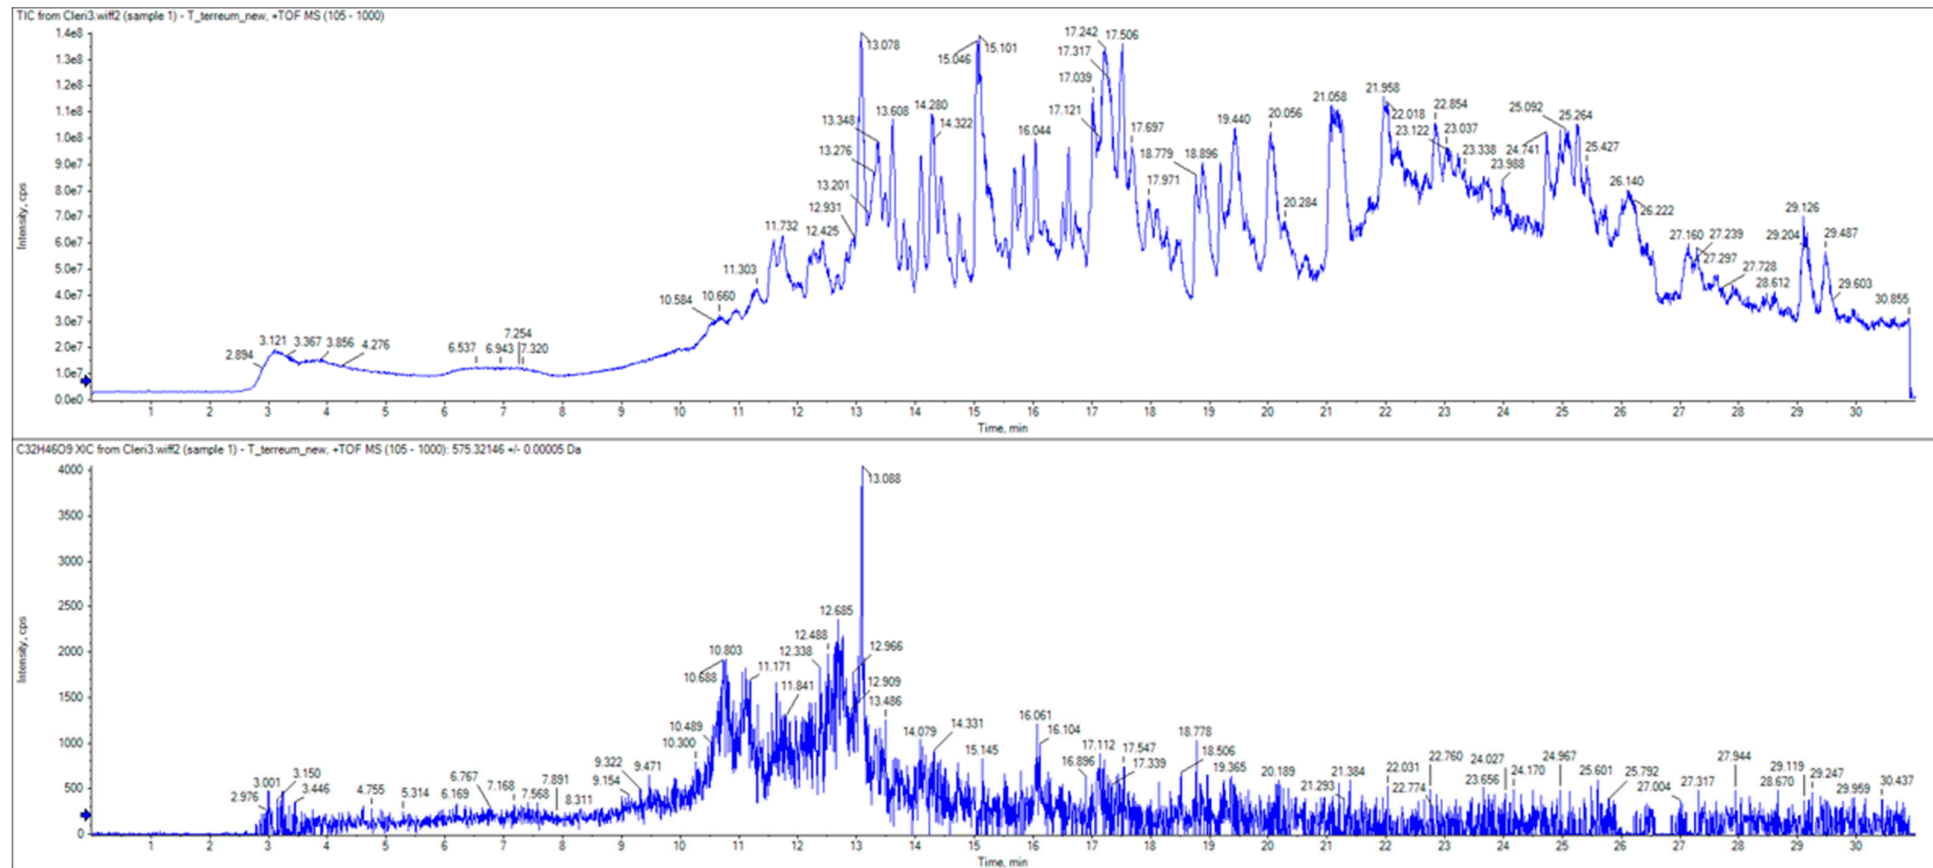

**Figure S3:** SIM search for the mass peak corresponding to the formula  $C_{32}H_{46}O_9$  (saponacelide M).

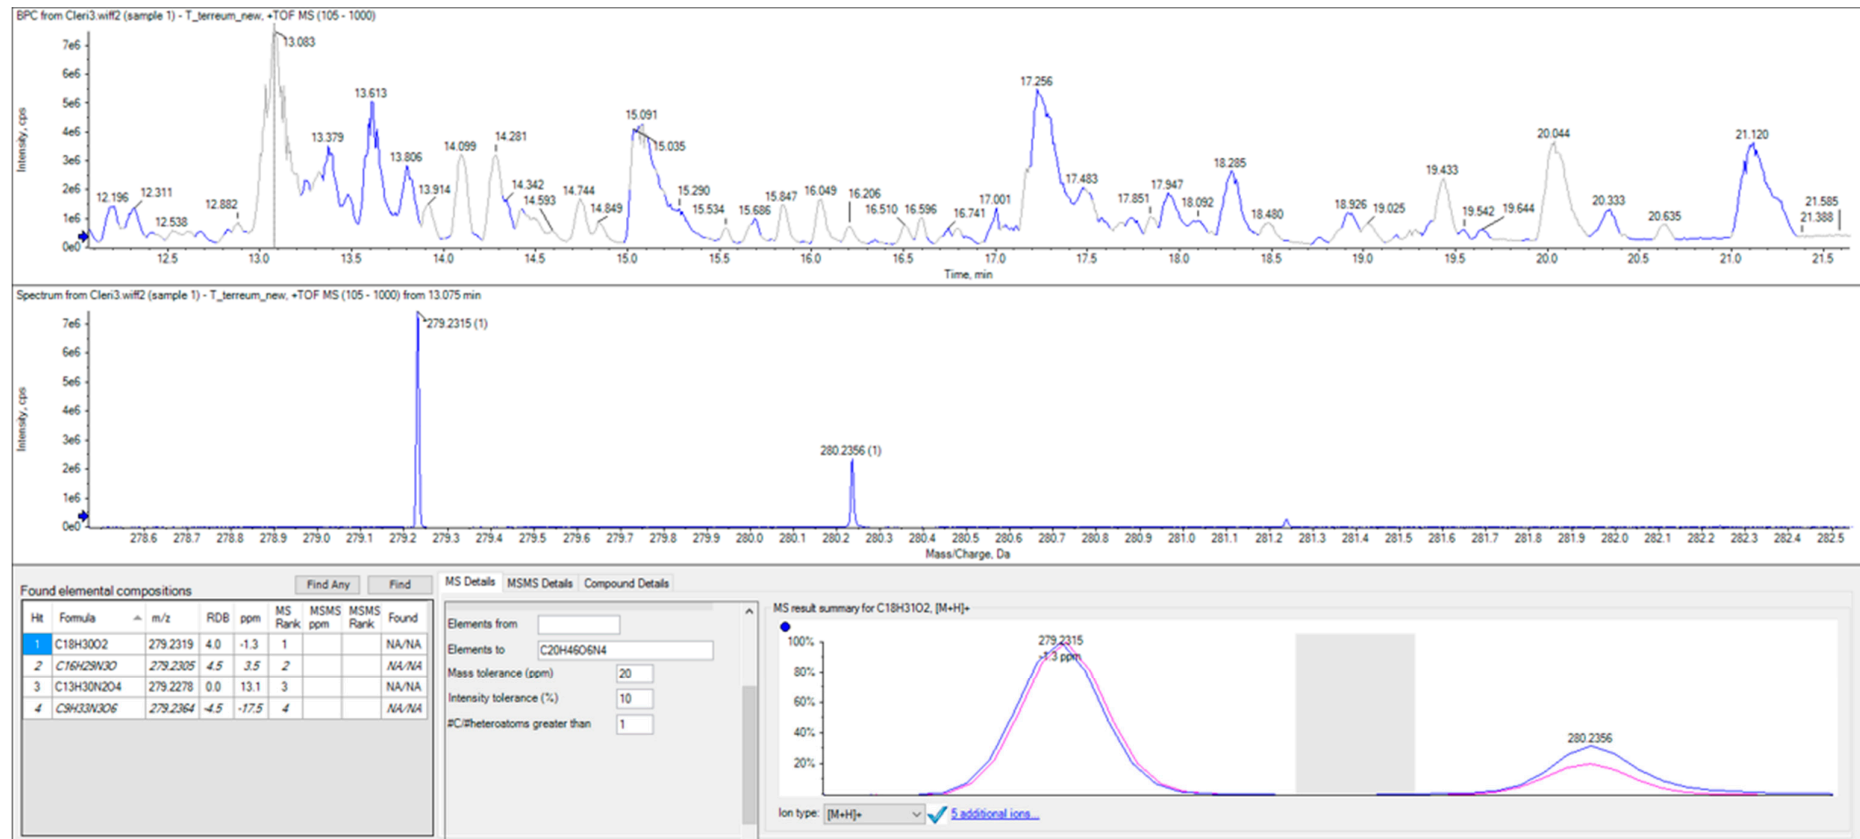

**Figure S4:** Mass spectrum of the peak at  $t_R$  13.1 minutes in the chromatogram of fig. 3. Best fit is found for a molecular formula C<sub>18</sub>H<sub>30</sub>O<sub>2</sub>.

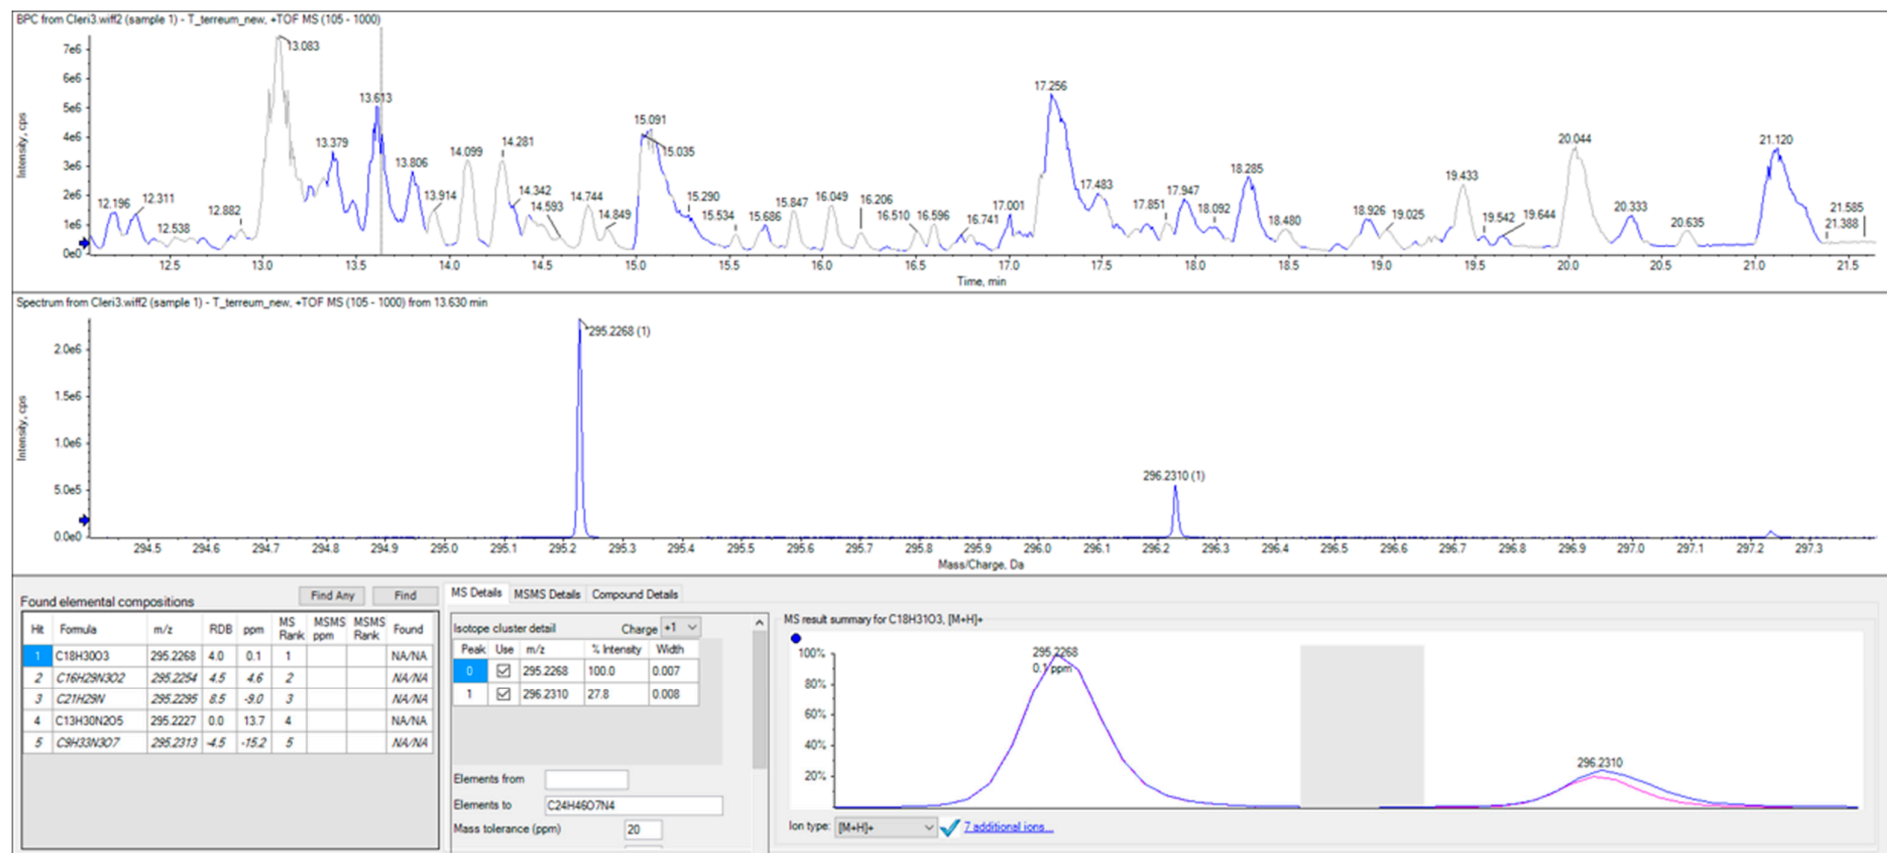

**Figure S5:** Mass spectrum of the peak at  $t_R$  13.6 minutes in the chromatogram of fig. 3. Best fit is found for a molecular formula C<sub>18</sub>H<sub>30</sub>O<sub>3</sub>.

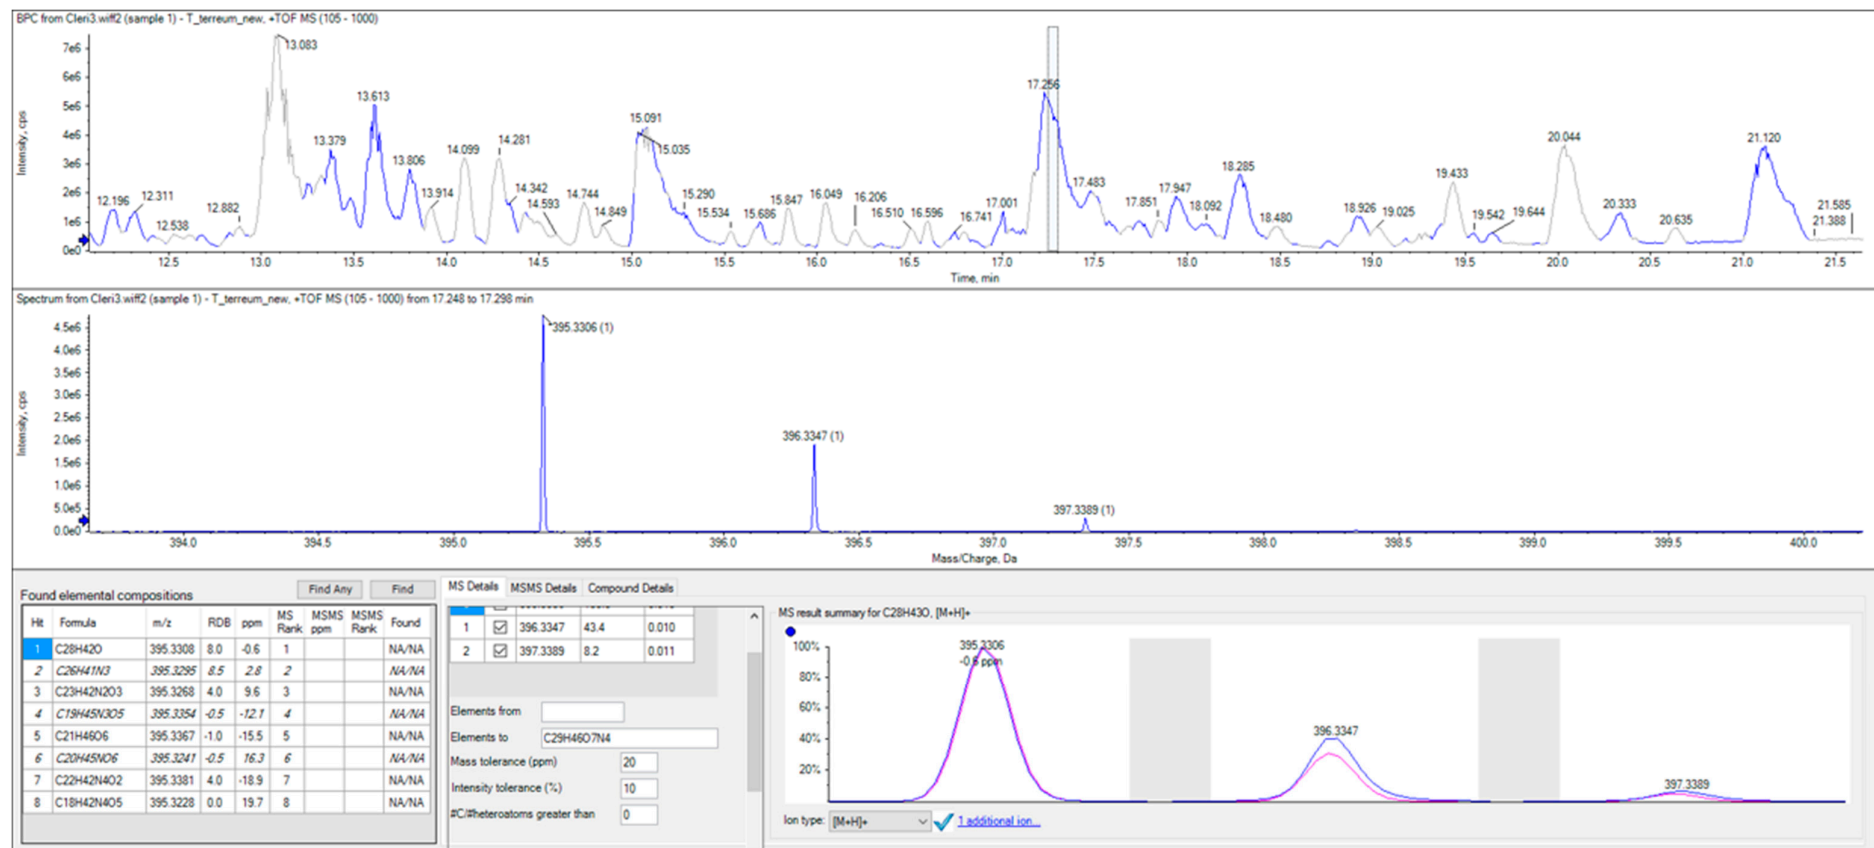

**Figure S6:** Mass spectrum of the peak at  $t_R$  17.3 minutes in the chromatogram of fig. 3. Best fit is found for a molecular formula C<sub>28</sub>H<sub>42</sub>O.

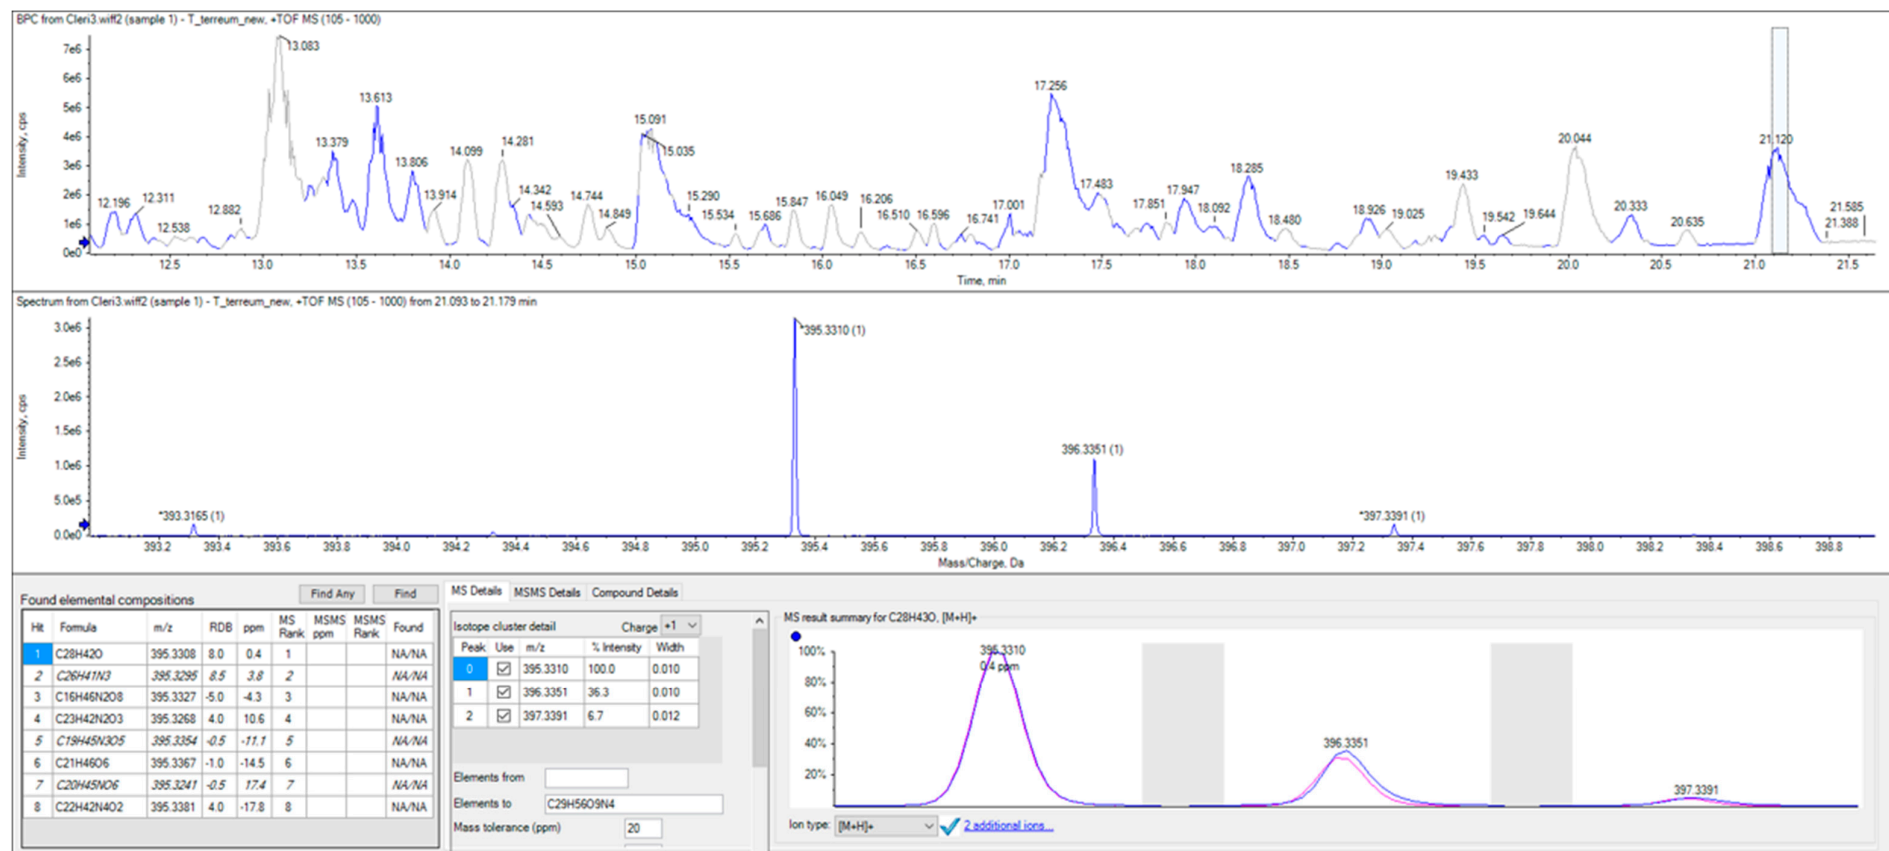

**Figure S7:** Mass spectrum of the peak at  $t_R$  21.1 minutes in the chromatogram of fig. 3. Best fit is found for a molecular formula C<sub>28</sub>H<sub>42</sub>O

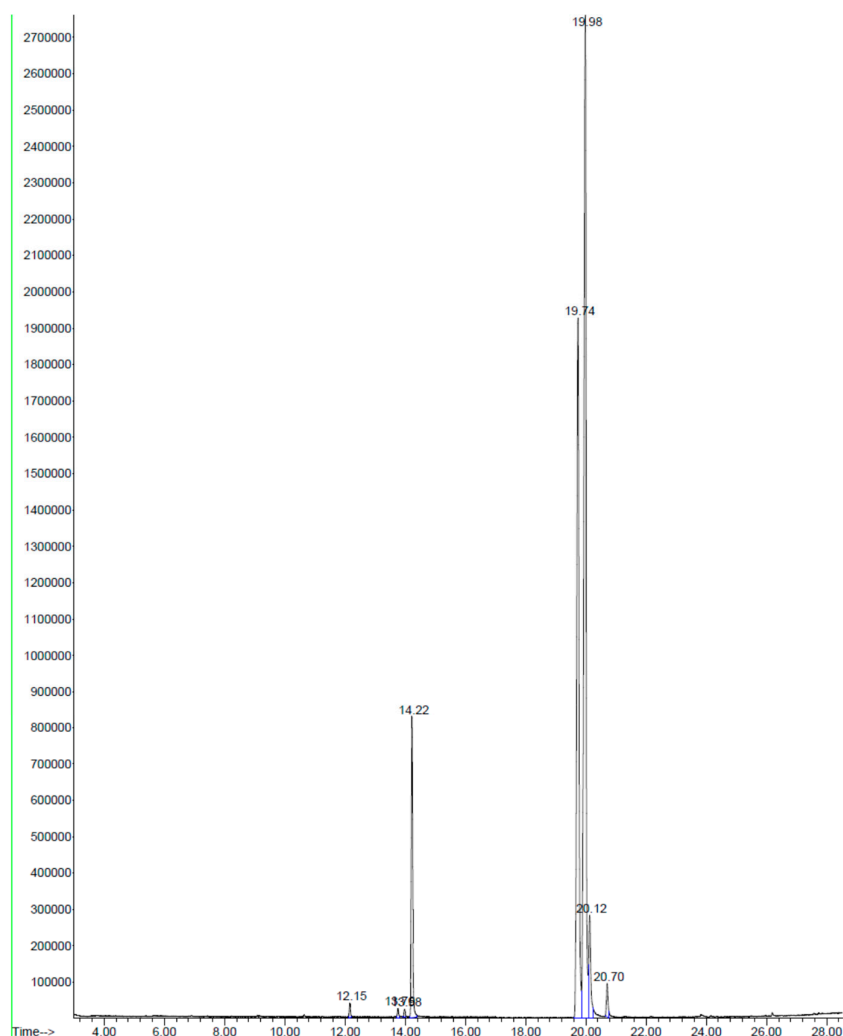

| peak<br># | R.T.<br>min | first<br>scan | max<br>scan | last<br>scan | PK<br>TY | peak<br>height | corr.<br>area | corr.<br>% max. | % of<br>total |
|-----------|-------------|---------------|-------------|--------------|----------|----------------|---------------|-----------------|---------------|
| 1         | 12.153      | 1709          | 1715        | 1727         | M2       | 40583          | 1046539       | 0.74%           | 0.366%        |
| 2         | 13.755      | 2006          | 2015        | 2024         | M6       | 26051          | 816460        | 0.58%           | 0.285%        |
| 3         | 13.974      | 2048          | 2056        | 2064         | M5       | 21426          | 627305        | 0.44%           | 0.219%        |
| 4         | 14.220      | 2087          | 2102        | 2133         | M2       | 830081         | 28337847      | 20.10%          | 9.901%        |
| 5         | 19.742      | 3015          | 3035        | 3052         | M2       | 1935090        | 98870253      | 70.12%          | 34.544%       |
| 6         | 19.980      | 3052          | 3071        | 3086         | M        | 2766602        | 140998092     | 100.00%         | 49.263%       |
| 7         | 20.126      | 3087          | 3093        | 3109         | M3       | 282116         | 12236644      | 8.68%           | 4.275%        |
| 8         | 20.702      | 3172          | 3180        | 3189         | M4       | 91188          | 3283962       | 2.33%           | 1.147%        |

$t_R$  12.15 min: pentadecanoic acid methyl ester

$t_R$  13.75 min and 13.97 min: palmitoleic acid methyl ester isomers

$t_R$  14.22 min: palmitic acid methyl ester

$t_R$  19.74 min: linoleic acid methyl ester

$t_R$  19.98 min: oleic acid methyl ester

$t_R$  20.13 min: asclepic acid methyl ester

$t_R$  20.70 min: stearic acid methyl ester

**Figure S8:** GC-MS analysis of the fatty acid content of the *T. terreum*\_Bz extract.

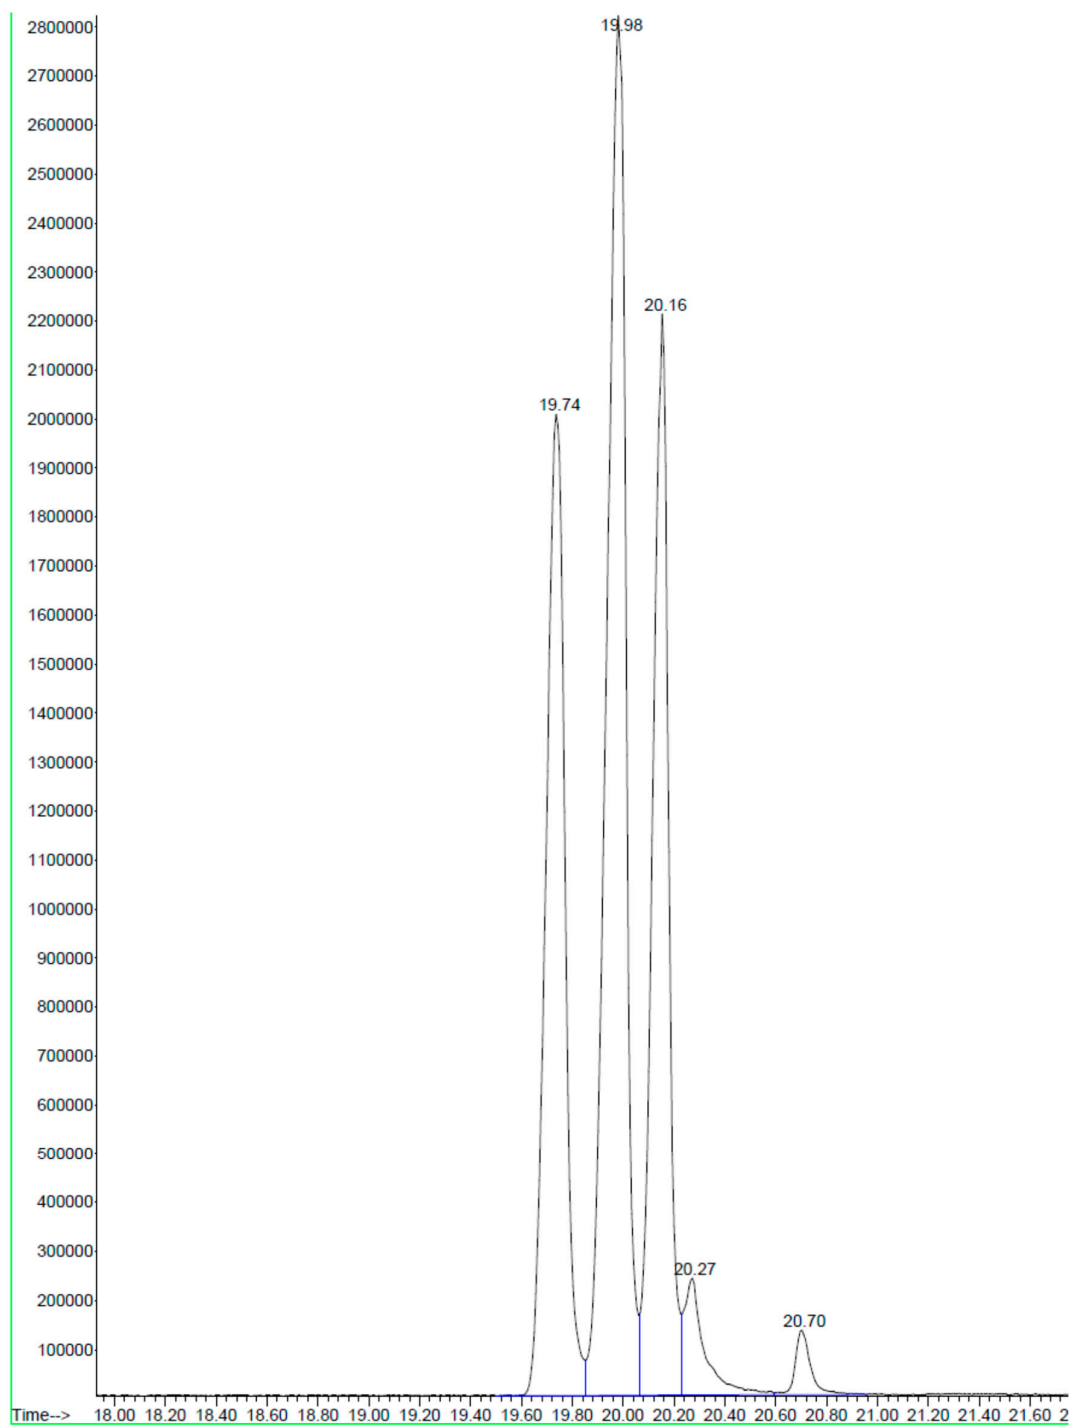

**Figure S9:** GC-MS analysis of the fatty acid content of the *T. terreum*\_Bz extract after addition of a reference standard of asclepic acid ( $t_R$  20.16 min) containing the corresponding *trans* isomer (vaccenic acid,  $t_R$  20.27 min).

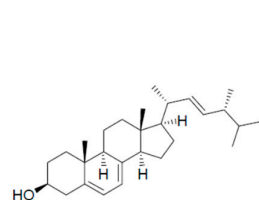

Ergosterol from *T. terreum*/CDCl<sub>3</sub> 400 MHz

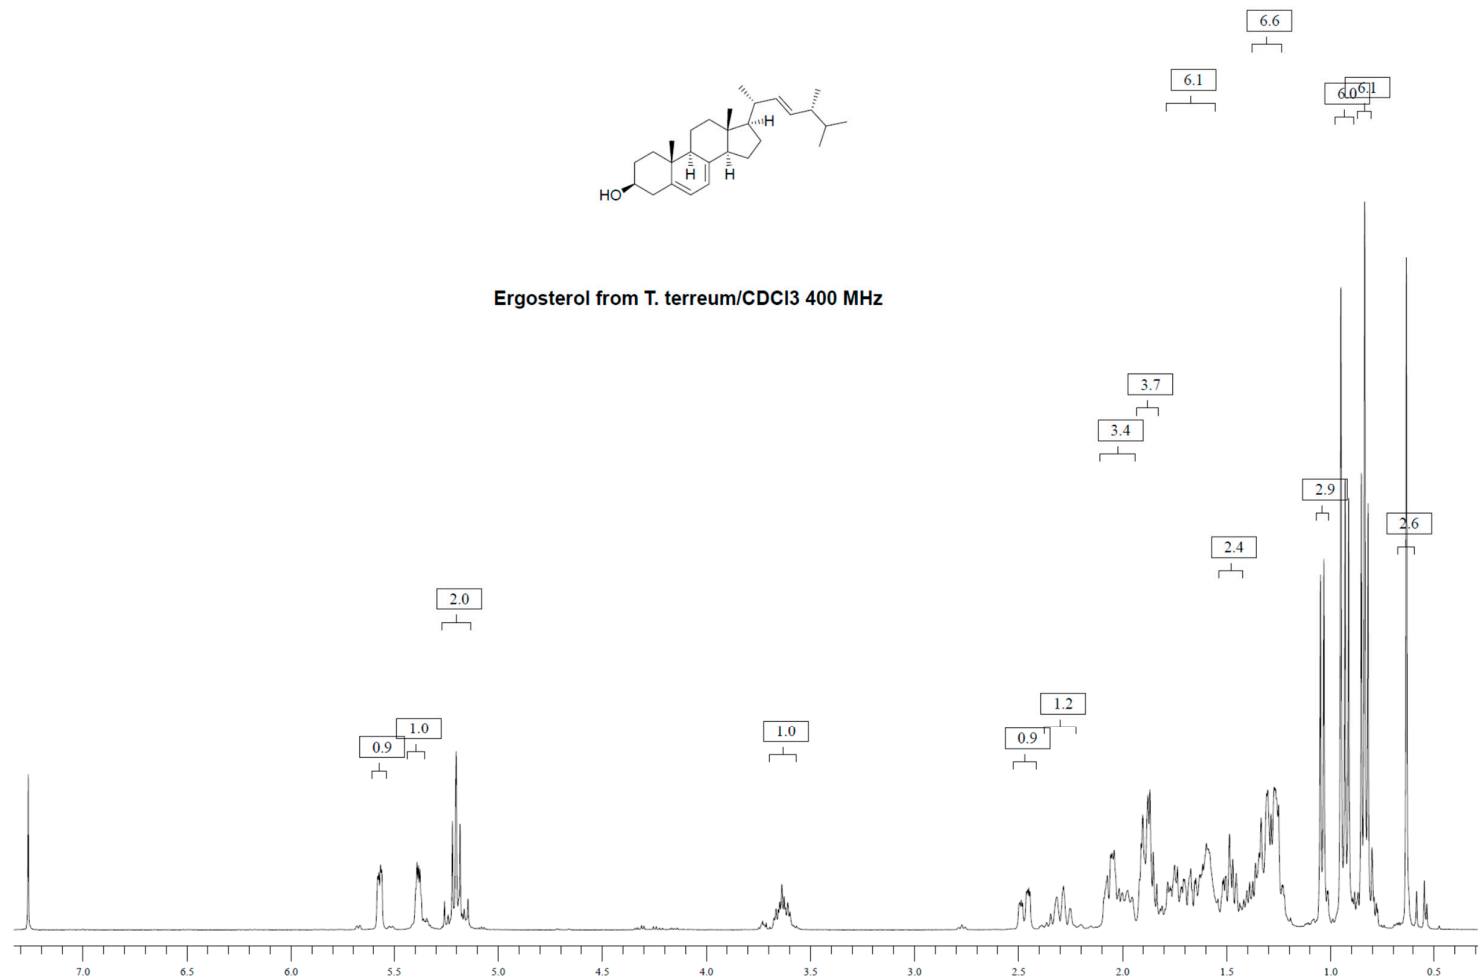

**Figure S10:** <sup>1</sup>H NMR spectrum of ergosterol extracted from *T. terreum* \_Bz.



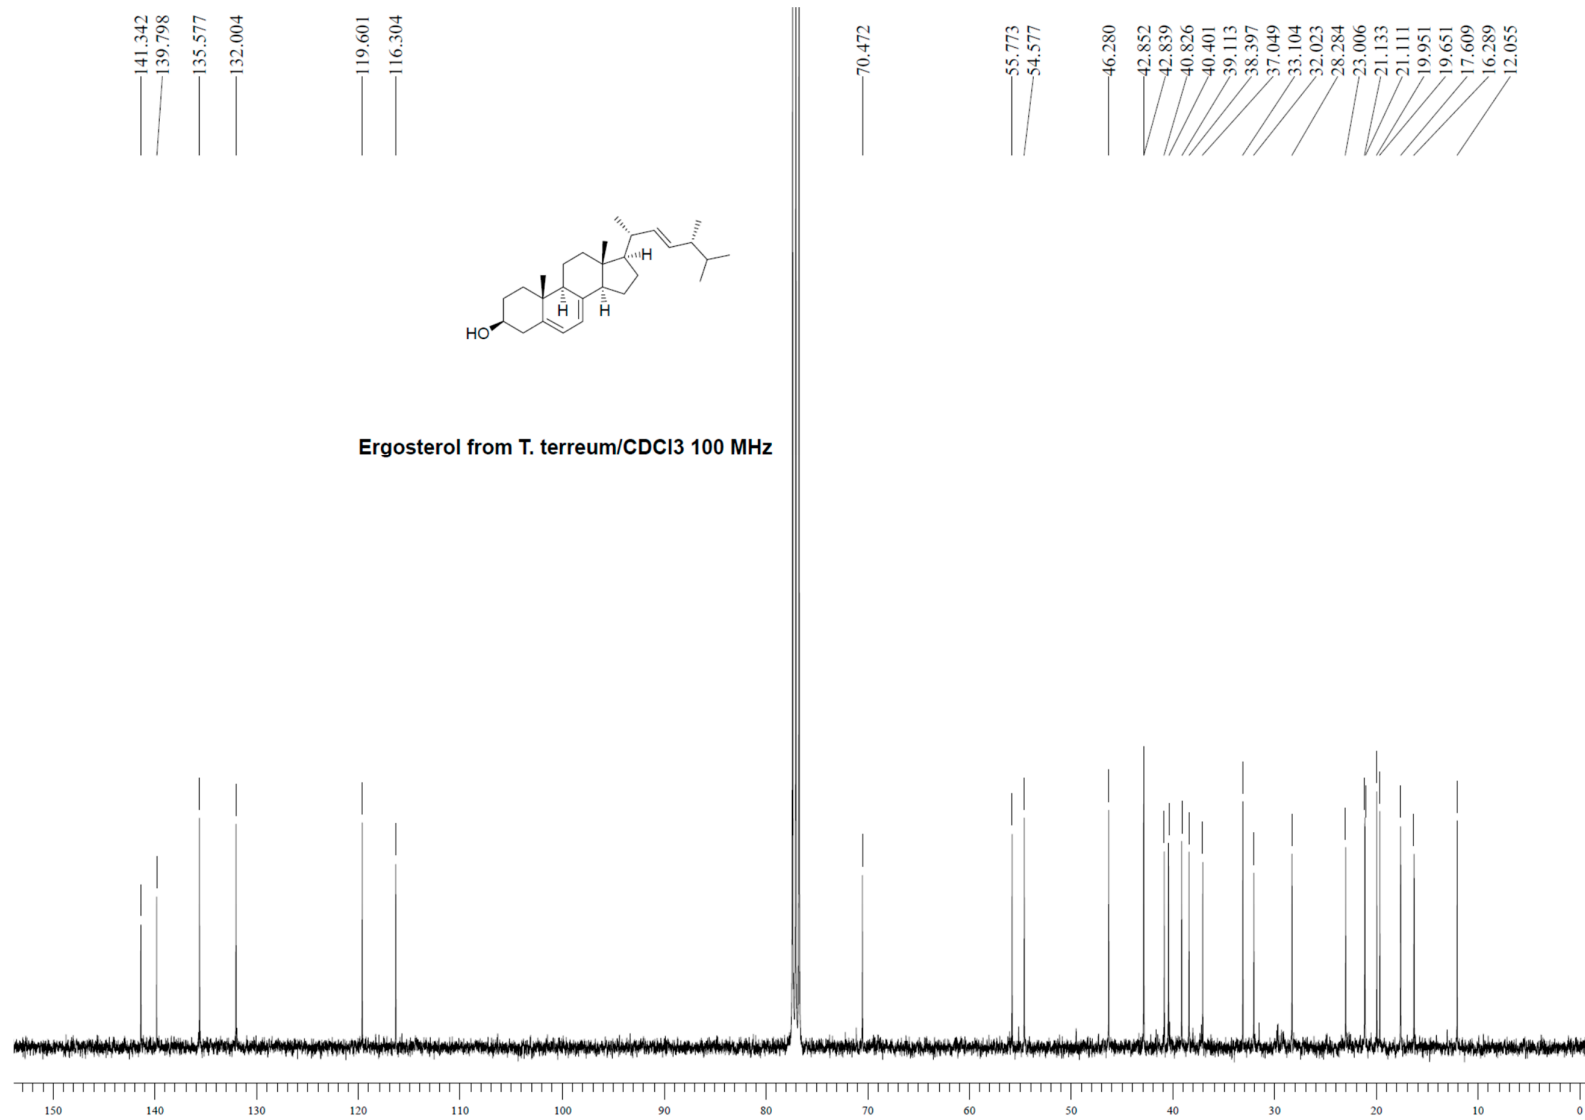

**Figure S11:** <sup>13</sup>C NMR spectrum of ergosterol extracted from *T. terreum*\_Bz.

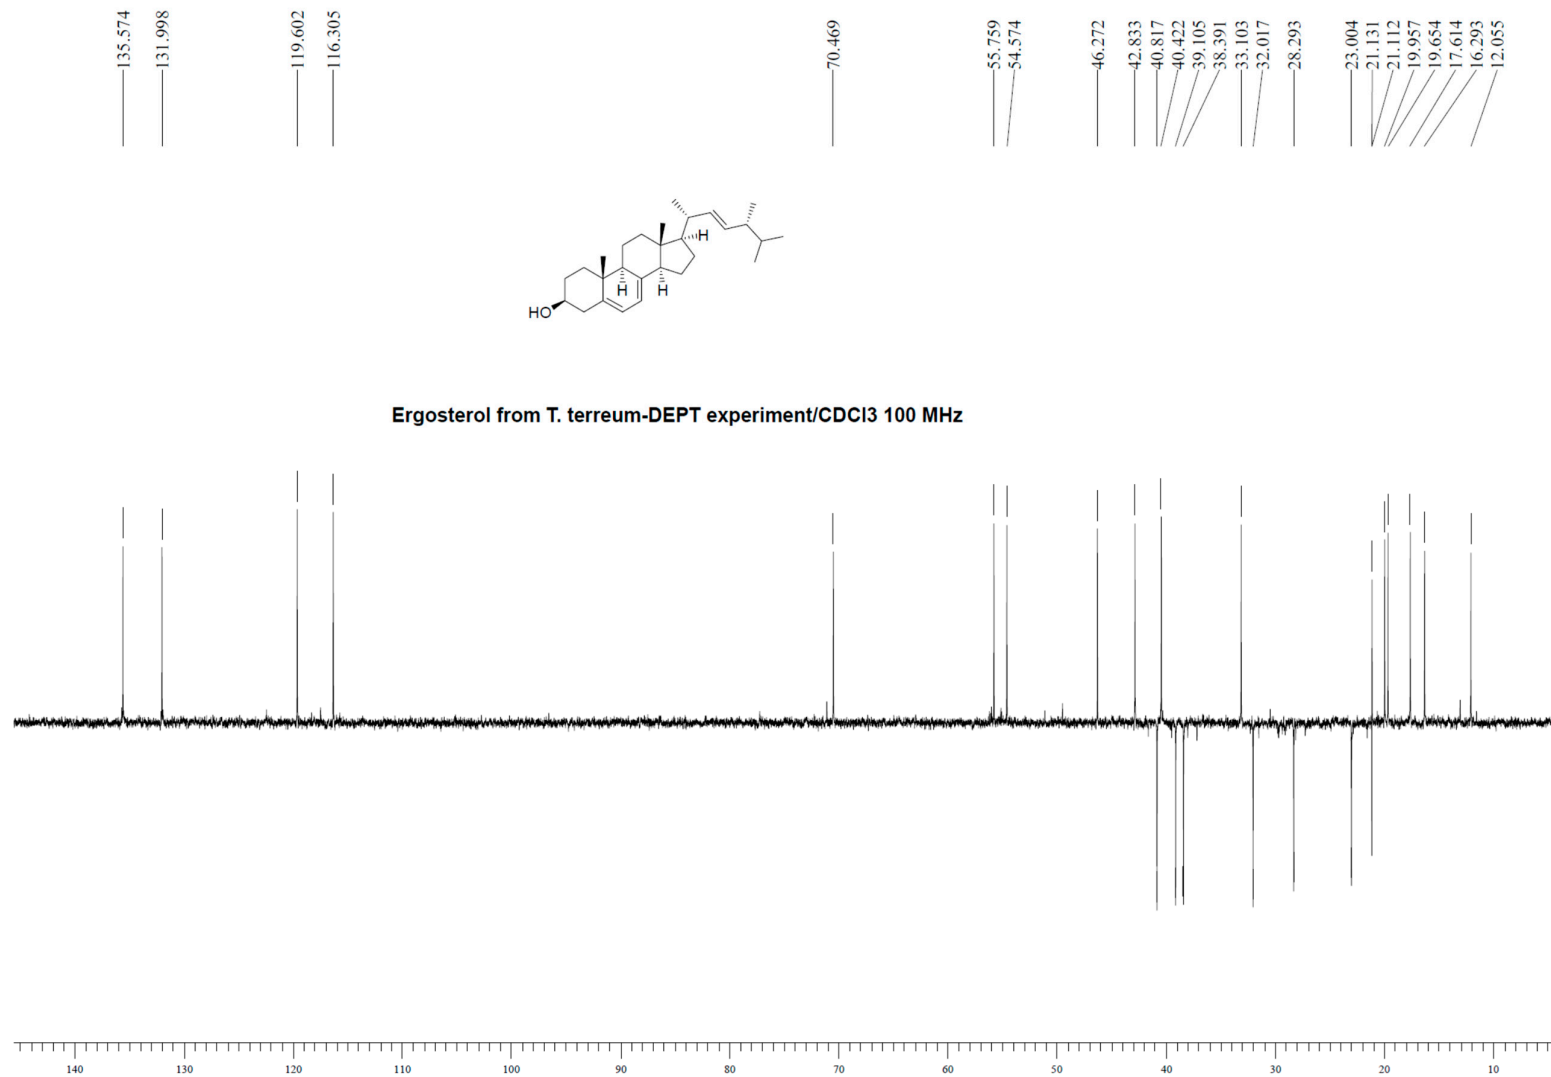

**Figure S12:**  $^{13}\text{C}$  DEPT135 NMR spectrum of ergosterol extracted from *T. terreum* \_Bz.

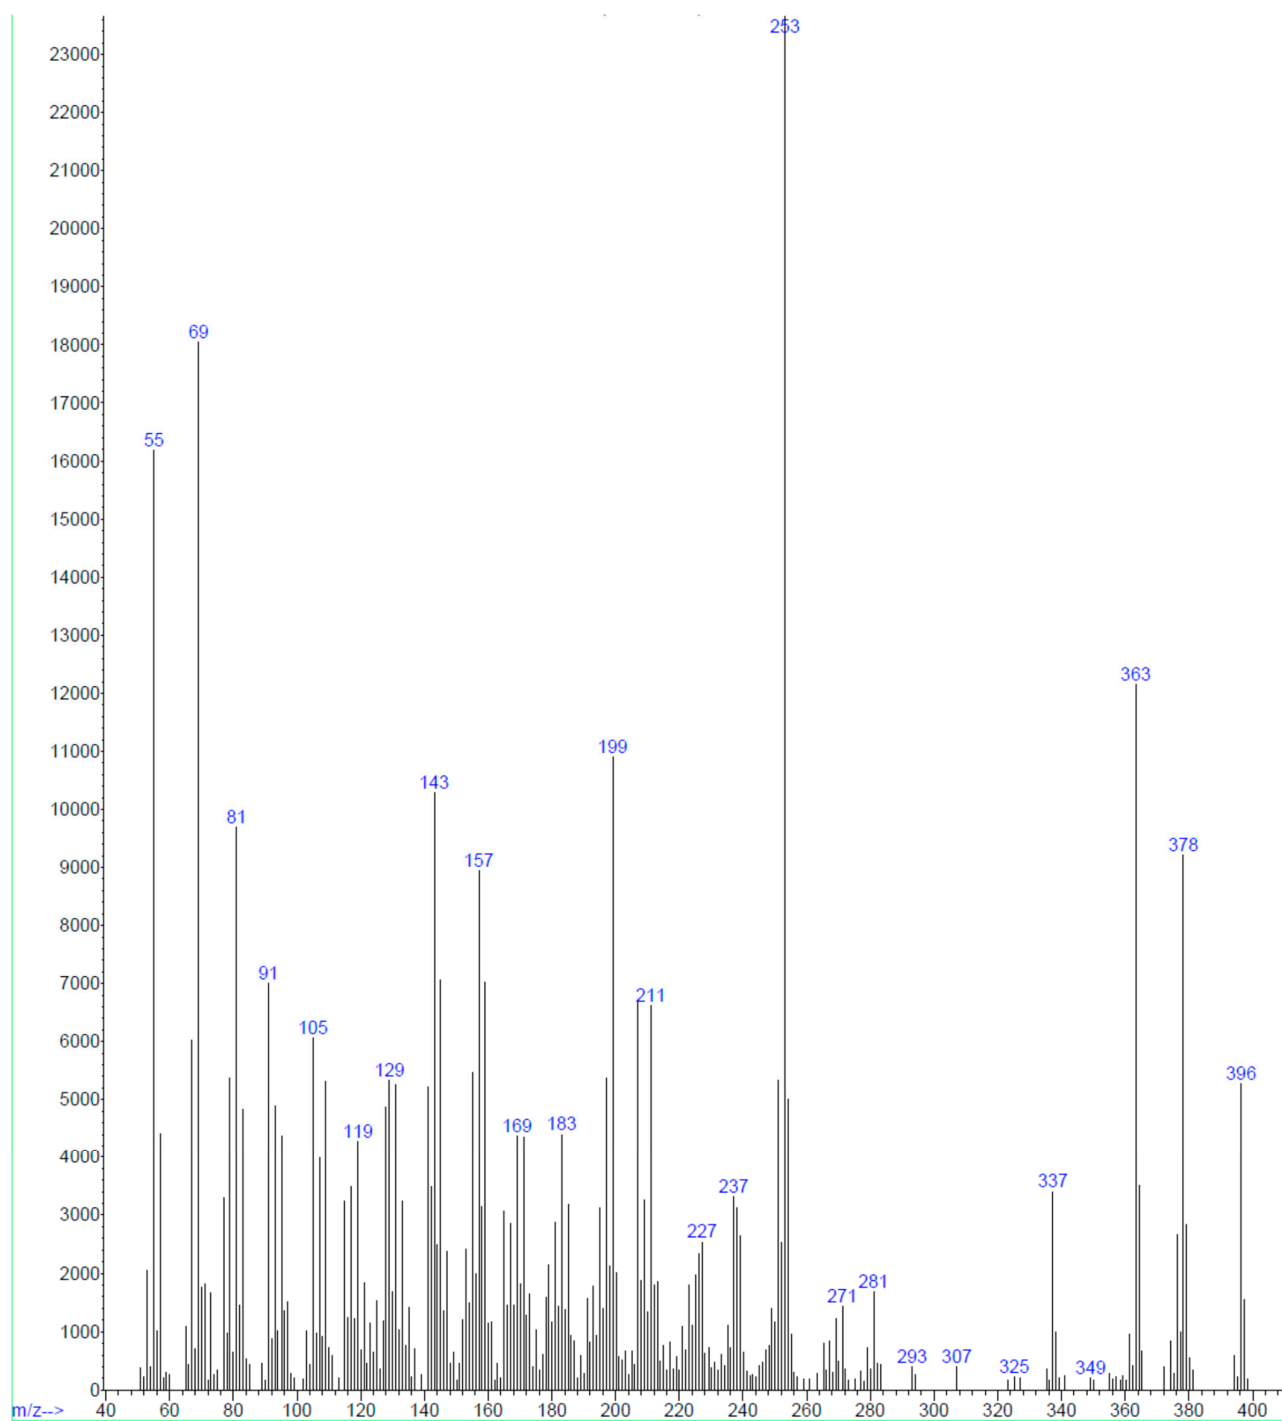

**Figure S13:** GC-MS spectrum of ergosterol extracted from *T. terreum*\_Bz



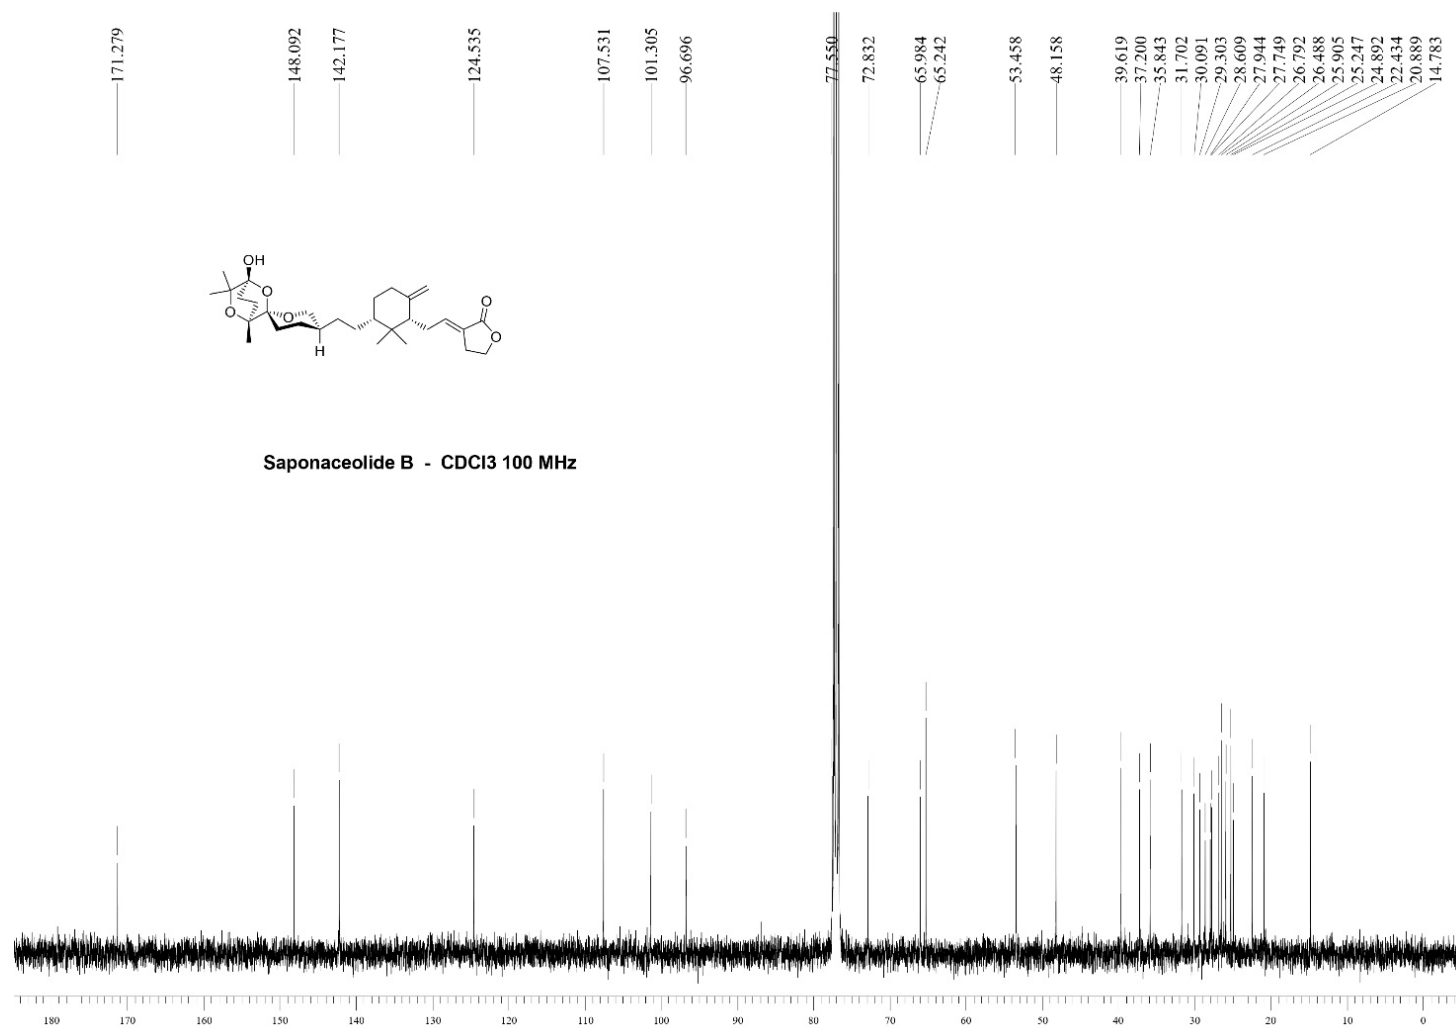

**Figure S15:** <sup>13</sup>C NMR spectrum of the same sample.

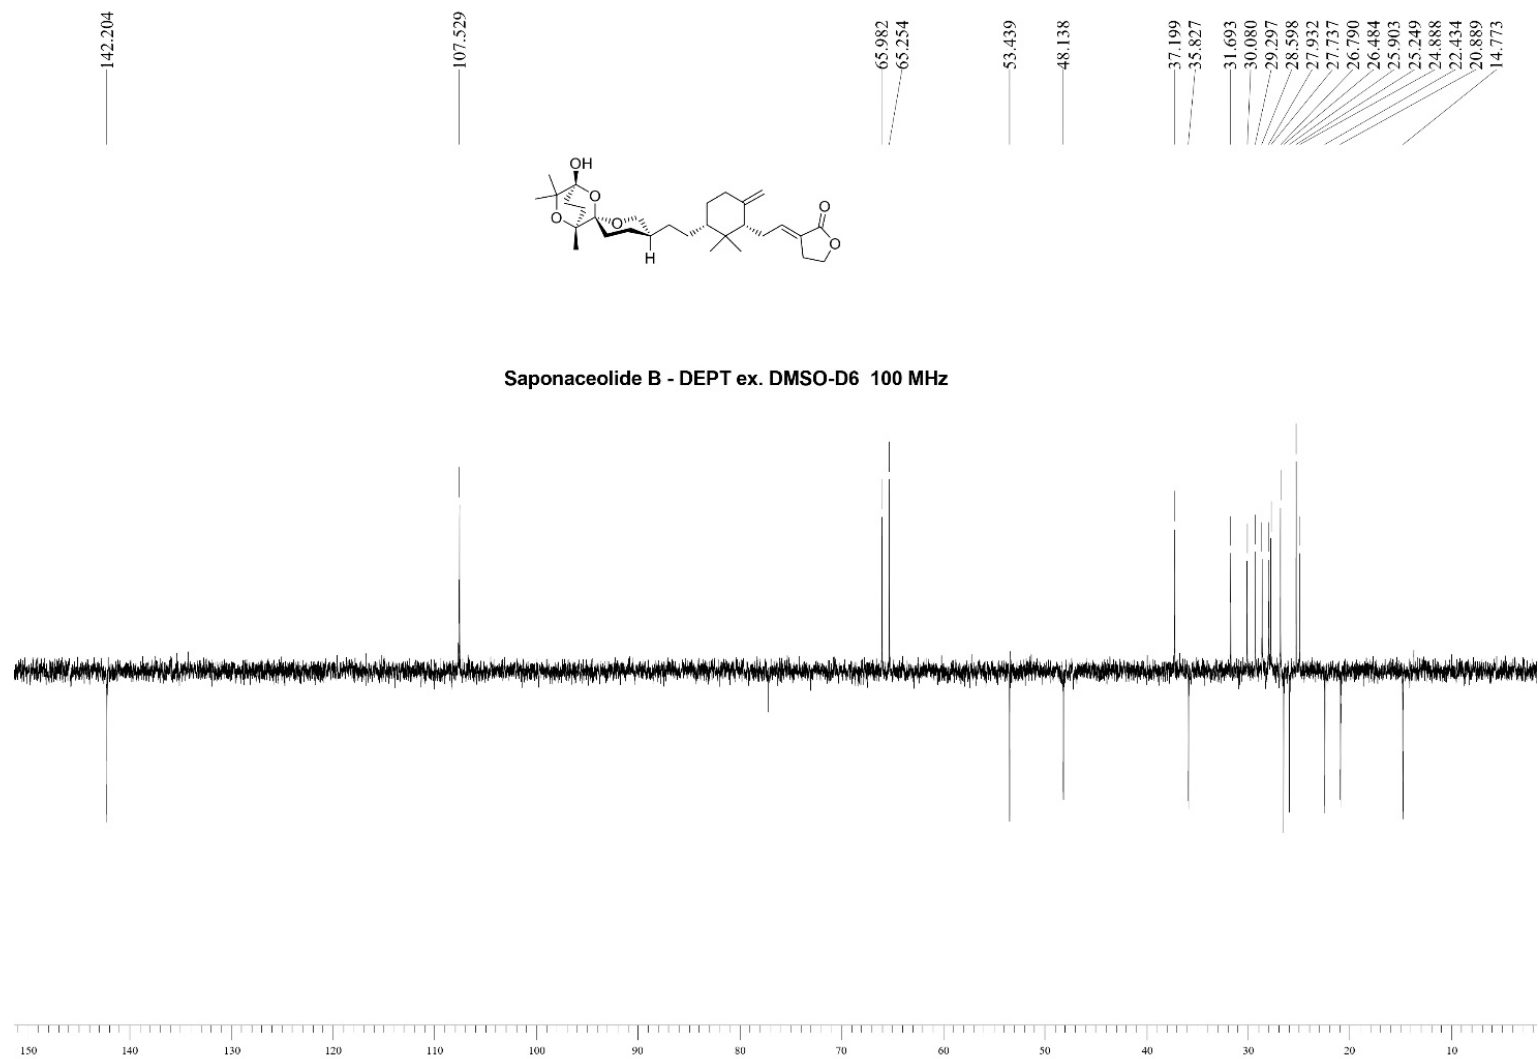

**Figure S16:**  $^{13}\text{C}$  DEPT135 NMR spectrum of the same sample.

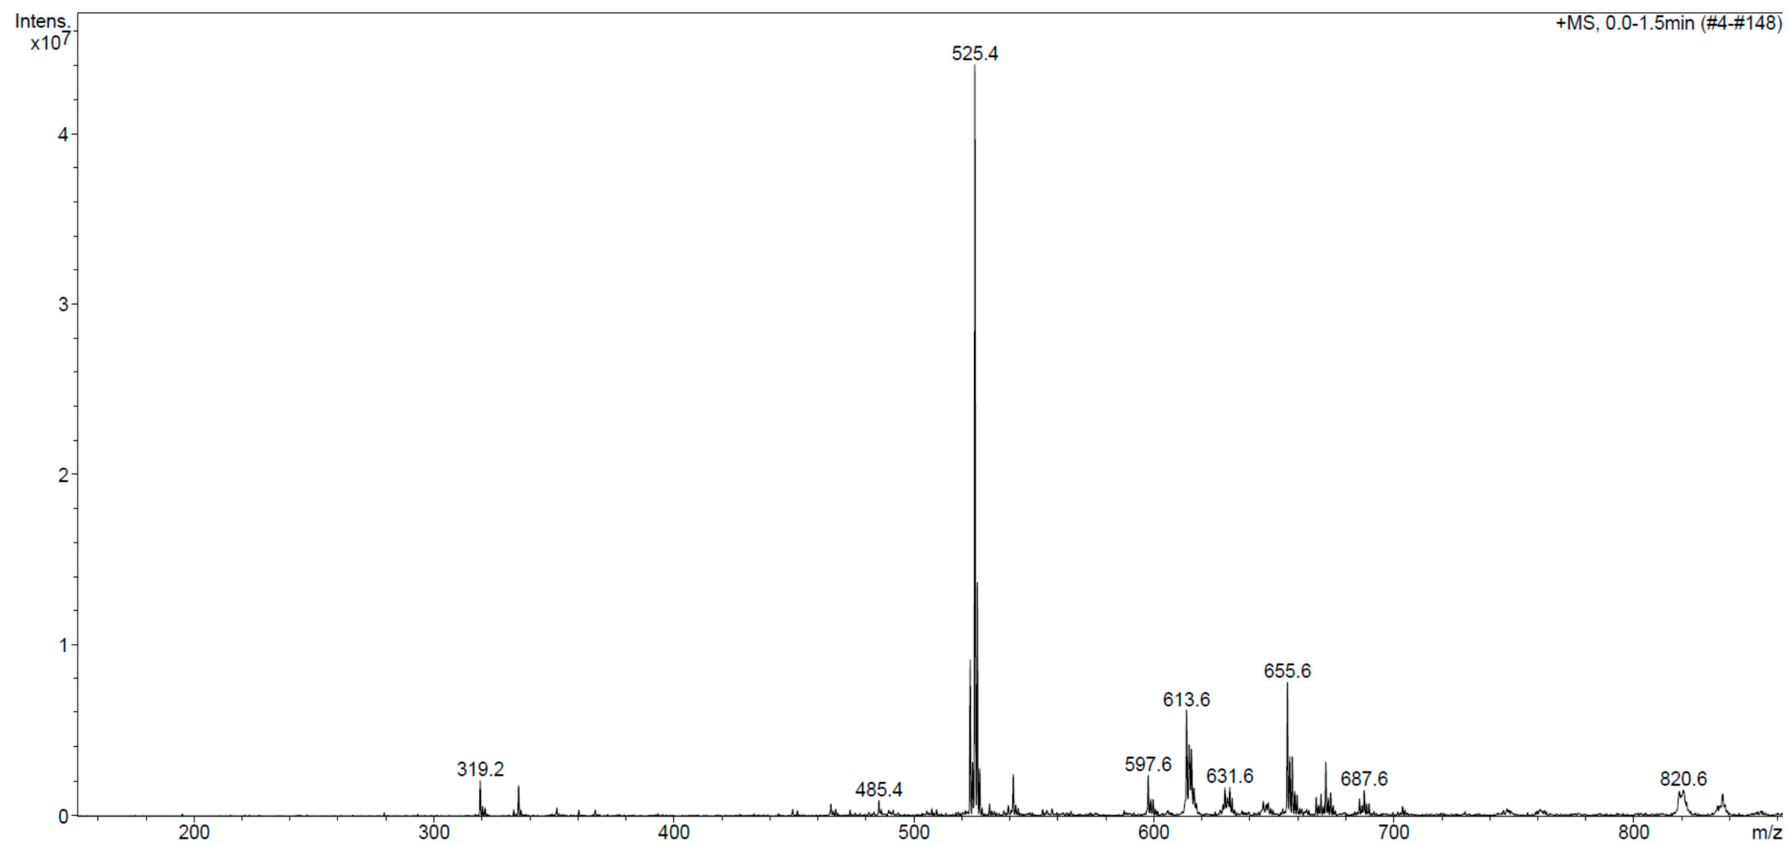

**Figure S17:** Low resolution ESI<sup>+</sup> MS spectrum of the same sample.

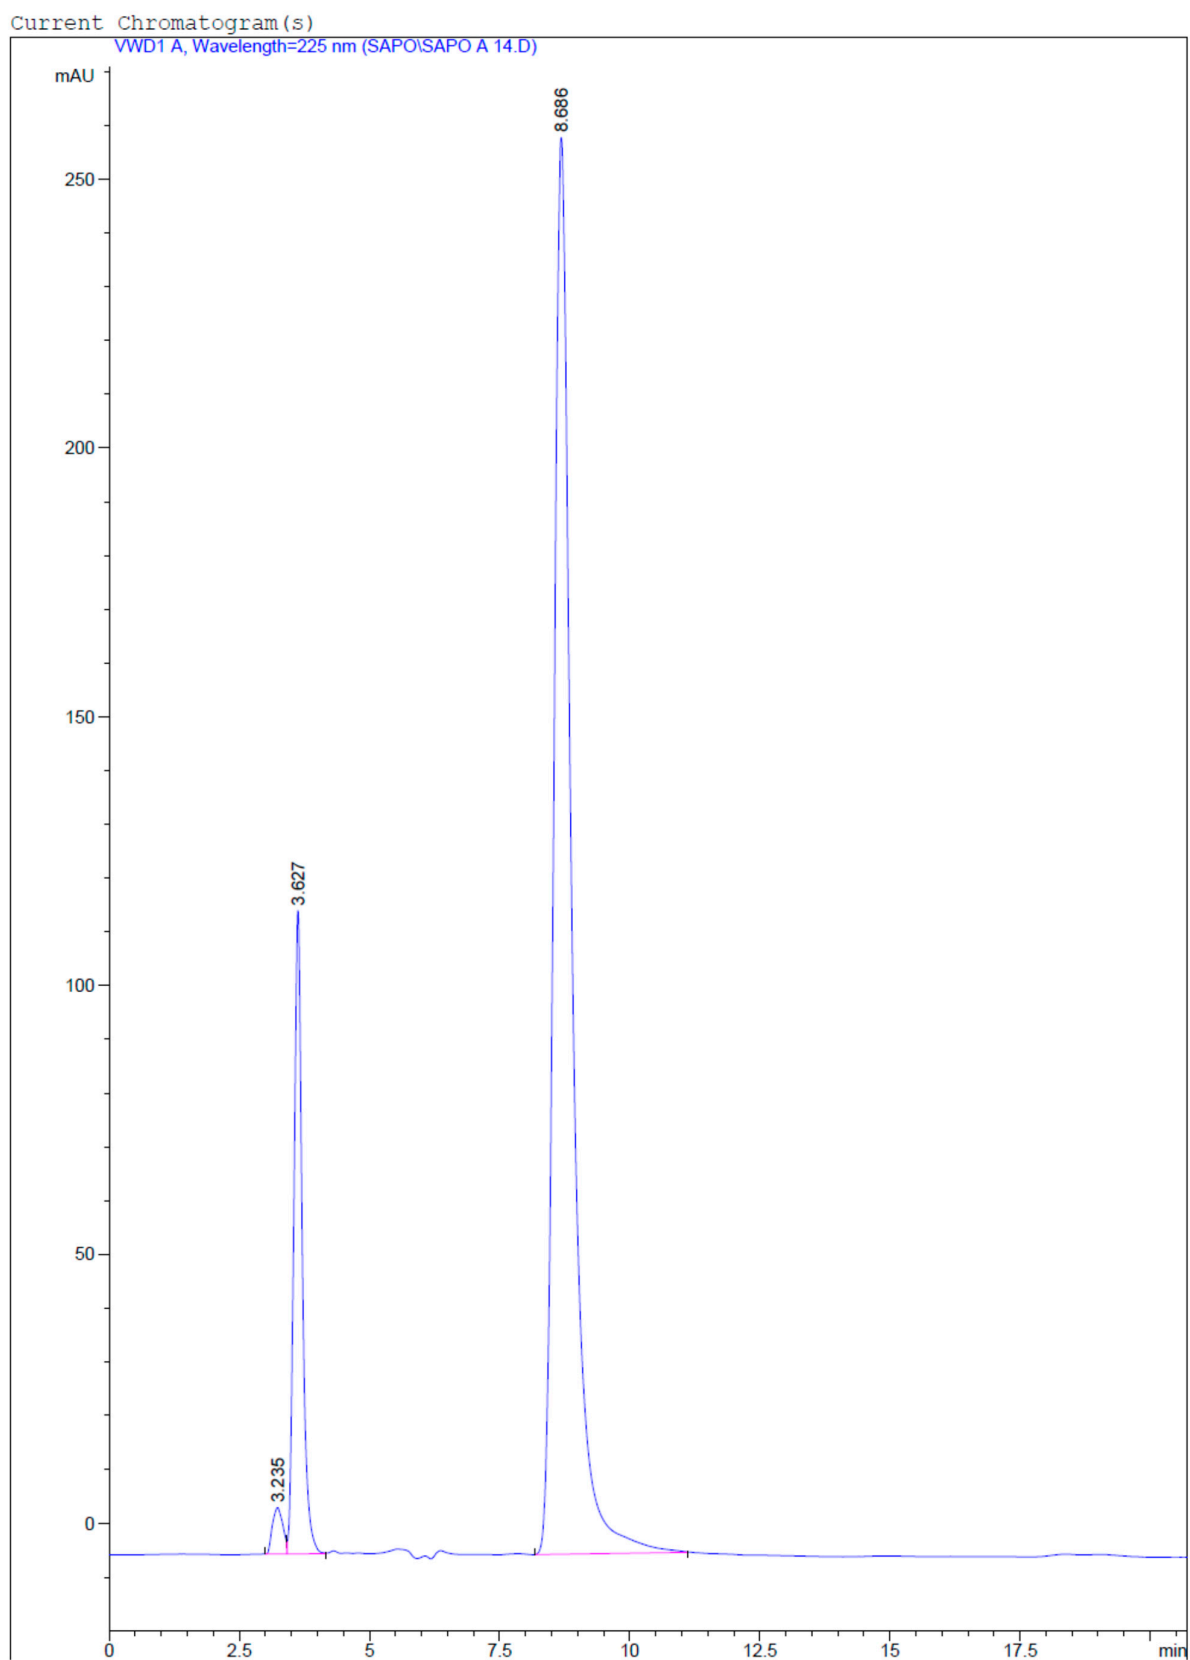

**Figure S18:** Direct-phase HPLC chromatogram (UV, 225 nm) of a reference standard of saponaceolide A



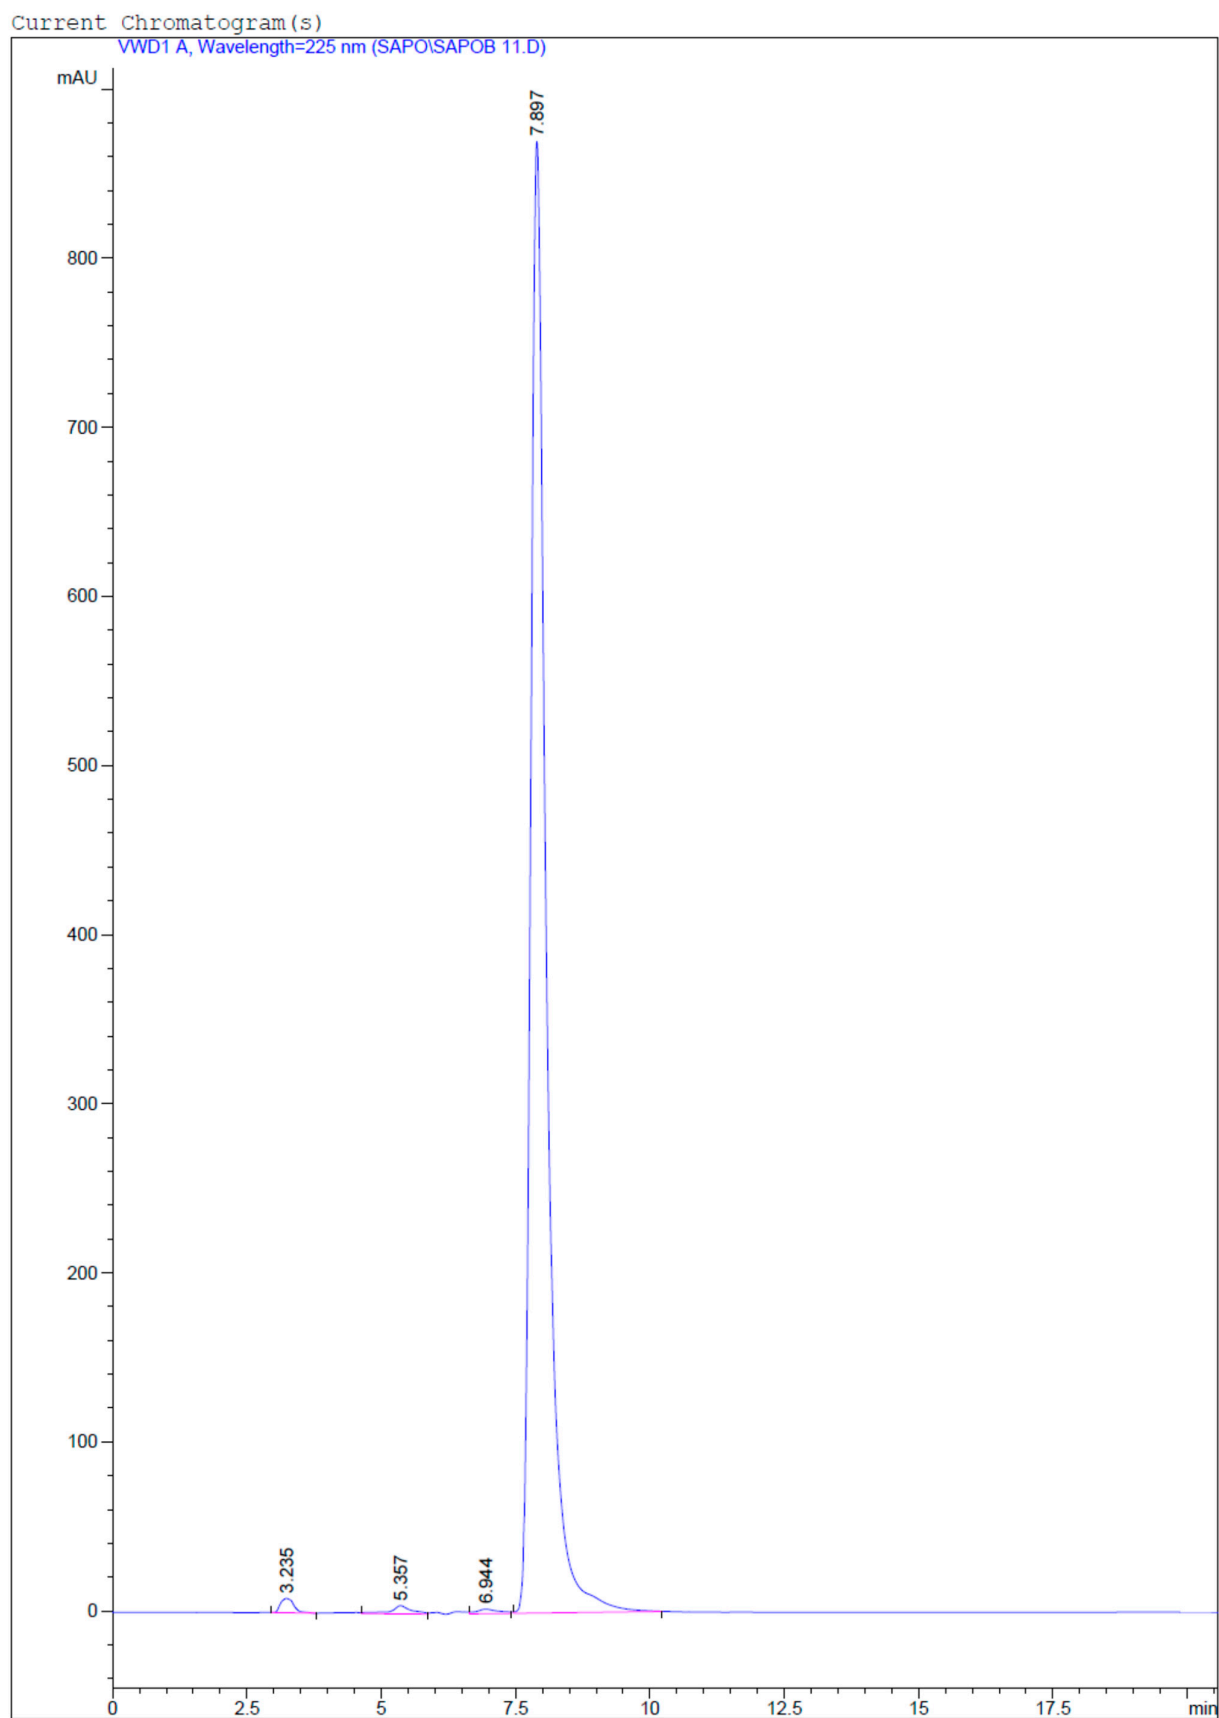

**Figure S19:** Direct-phase HPLC chromatogram of a reference standard of saponaceolide B.

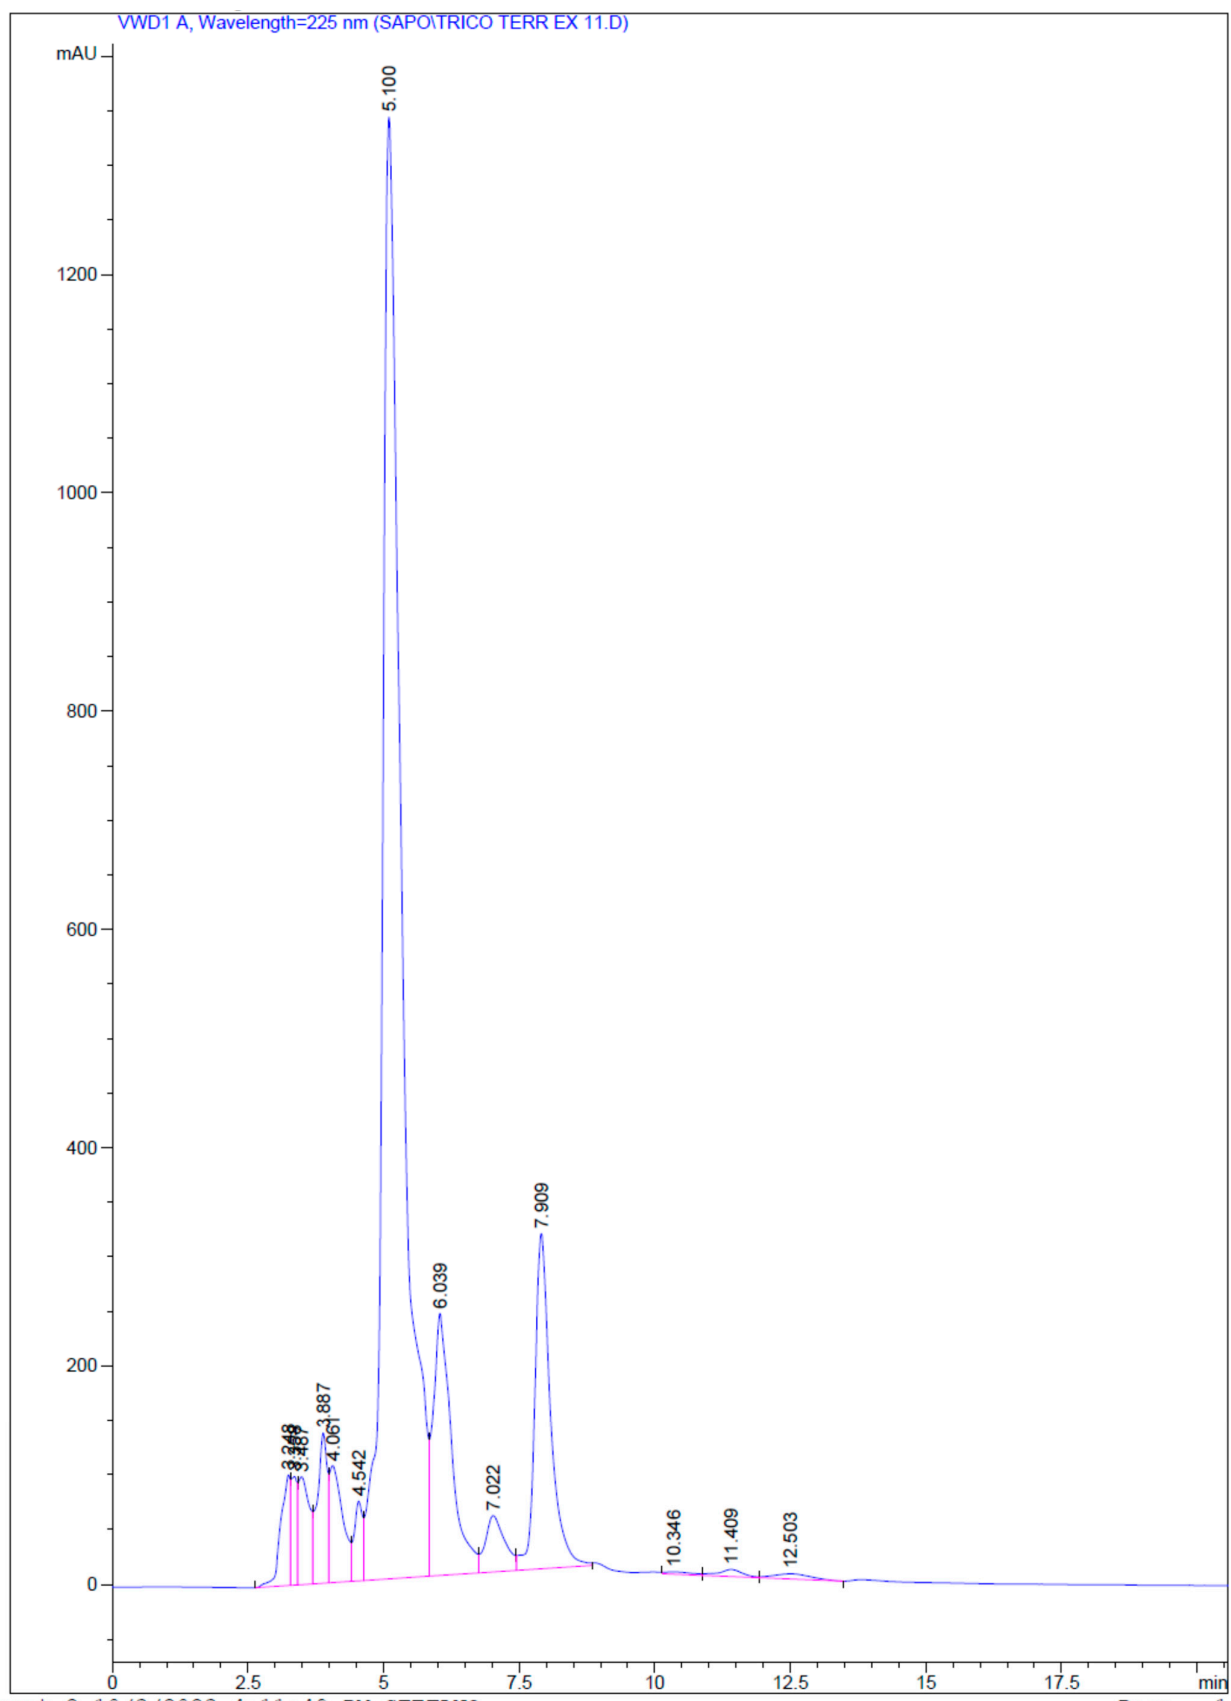

Figure S20: Direct-phase HPLC chromatogram of *T. terreum\_Bz*.

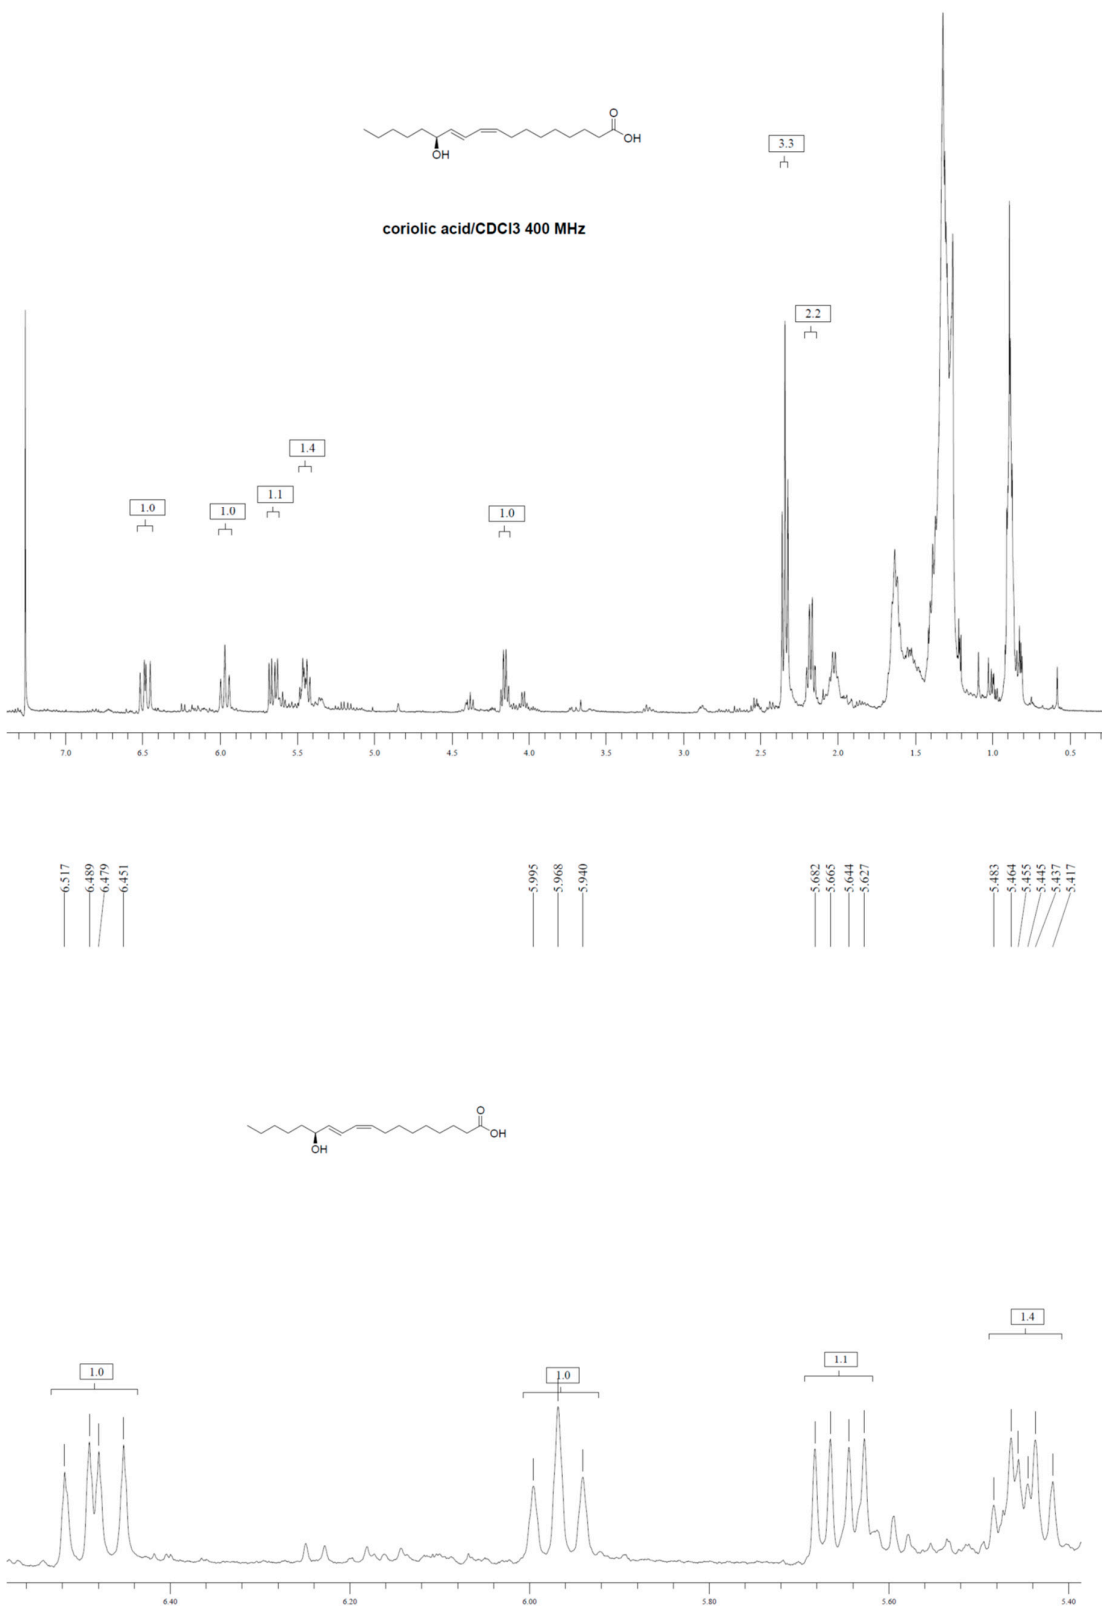

**Figure S21:** <sup>1</sup>H NMR spectrum of the coriolic acid extracted from *T. terreum*\_Bz; below the expansion of the vinylic protons signals

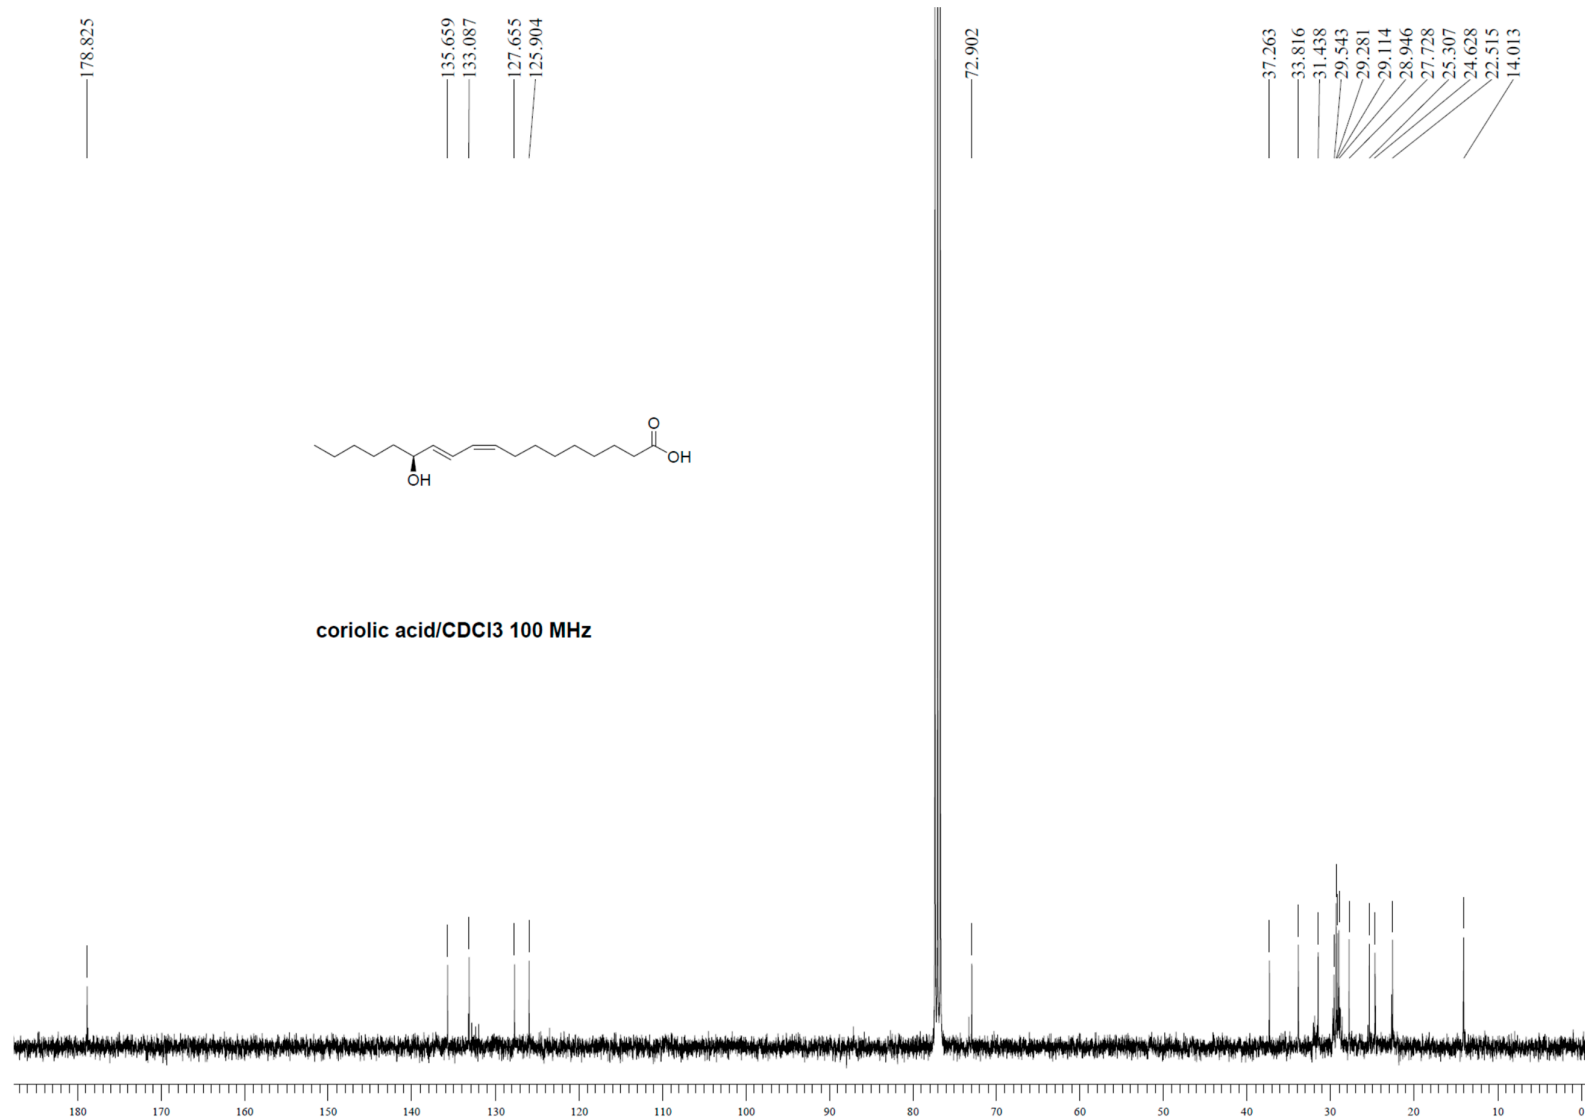

**Figure S22:** <sup>13</sup>C NMR spectrum of the coriolic acid extracted from *T. terreum*\_Bz

**Acquisition Parameter**

|                 |            |                 |            |              |           |                          |            |
|-----------------|------------|-----------------|------------|--------------|-----------|--------------------------|------------|
| Ion Source Type | ESI        | Mass Range Mode | Std/Normal | Ion Polarity | Positive  | Alternating Ion Polarity | off        |
| Scan Begin      | 50 m/z     | Scan End        | 950 m/z    | Averages     | 5 Spectra | Accumulation Time        | 32 $\mu$ s |
| Capillary Exit  | 128.5 Volt | Skim 1          | 40.0 Volt  | Trap Drive   | 55.0      | Auto MS/MS               | off        |

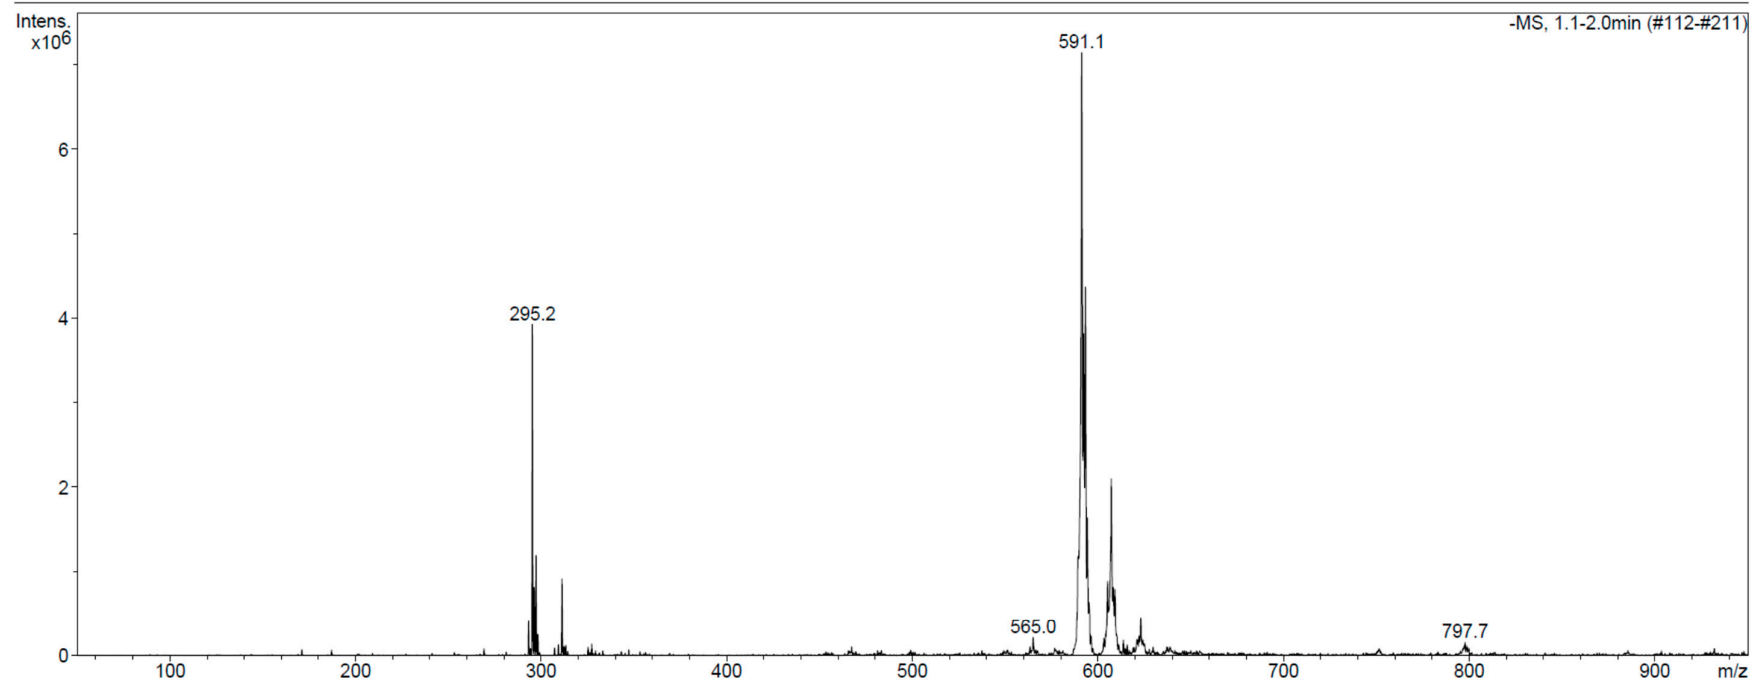**Figure S23:** ESI-MS spectrum of the coriolic acid extracted from *T. terreum*\_Bz
